# Supplementary material for: How TiO2facets determine arsenic adsorption and photooxidation: spectroscopic and DFT studies
Source: Royal Society of Chemistry journal article supplement (doi:10.1039/c5cy01679g), 2015-11-19
Supplement: c5cy01679g1.pdf [file c5cy01679g1.pdf]

## Supplementary Information

How TiO<sub>2</sub> facets determine arsenic adsorption and photooxidation: Spectroscopic and  
DFT study

Li Yan, Jingjing Du, Chuanyong Jing\*

State Key Laboratory of Environmental Chemistry and Ecotoxicology, Research  
Center for Eco-Environmental Sciences, Chinese Academy of Sciences, Beijing  
100085, China

Tel: +86 10 6284 9523; Fax: +86 10 6284 9523  
E-mail: [cyjing@rcees.ac.cn](mailto:cyjing@rcees.ac.cn)

**Table S1.** Summary of Characterization of three TiO<sub>2</sub> NPs.

| Sample                                                            | HM      | JR05    | TG01    |
|-------------------------------------------------------------------|---------|---------|---------|
| Crystalline phase                                                 | anatase | anatase | anatase |
| Particle size (nm)                                                |         |         |         |
| XRD                                                               | 4.6     | 7.5     | 18.4    |
| BET                                                               | 4.3     | 8.6     | 20.1    |
| TEM                                                               | 5       | 7       | 20      |
| S <sub>BET</sub> (m <sup>2</sup> /g)                              | 336     | 167     | 71      |
| Pore volume <sup>a</sup> (cm <sup>3</sup> /g)                     | 0.373   | 0.293   | 0.383   |
| Mean pore diameter <sup>b</sup> (nm)                              | 4.4     | 7.0     | 21.6    |
| Acid concentration (mmol/g)                                       | 0.078   | 0.036   | 0.043   |
| Exposed {001} facet (%)                                           | 4       | 17      | 7       |
| pHzpc                                                             | 5.3     | 6.5     | 6.1     |
| As(III) adsorption capacity (mg/g)                                | 136     | 138     | 71      |
| As(V) adsorption capacity (mg/g)                                  | 140     | 144     | 106     |
| As(III) surface coverage (molecules/nm <sup>2</sup> )             | 3.2     | 6.6     | 8.0     |
| As(V) surface coverage (molecules/nm <sup>2</sup> )               | 3.3     | 6.9     | 12.0    |
| As(III) loading (mol/mol acid)                                    | 23.2    | 51.1    | 22.0    |
| As(V) loading (mol/mol acid)                                      | 23.9    | 53.3    | 32.9    |
| As(III) photooxidation rate $k \times 10000$ (min <sup>-1</sup> ) | 60.0    | 213     | 225     |

<sup>a</sup> Single point adsorption total pore volume.

<sup>b</sup> Adsorption average pore diameter (4V/A by BET).

**Table S2.** Langmuir modeling for As(III) and As(V) adsorbed on three TiO<sub>2</sub>.

| TiO <sub>2</sub><br>Samples | As(III)                           |                 |       | As(V)                             |                 |       |
|-----------------------------|-----------------------------------|-----------------|-------|-----------------------------------|-----------------|-------|
|                             | $q_m$<br>(mg/g TiO <sub>2</sub> ) | $K_L$<br>(L/mg) | $R^2$ | $q_m$<br>(mg/g TiO <sub>2</sub> ) | $K_L$<br>(L/mg) | $R^2$ |
| HM                          | 136                               | 0.019           | 0.967 | 140                               | 0.005           | 0.950 |
| JR05                        | 138                               | 0.018           | 0.969 | 144                               | 0.012           | 0.917 |
| TG01                        | 71                                | 0.004           | 0.979 | 106                               | 0.003           | 0.976 |

## 1. X-ray diffraction.

The XRD patterns shown in Fig. S1 suggested that all TiO<sub>2</sub> NPs were in pure anatase phase. The XRD patterns of HM (JCPDS No. 21-1272), JR05 (JCPDS No. 21-1272), and TG01 (JCPDS No. 65-5714) indicated the 2θ diffraction positions match the standard anatase pattern. The particle sizes of the three TiO<sub>2</sub> NPs calculated using the Sherrer formula from peak widths in the X-ray diffractograms are reported in Table 1 in the main text.

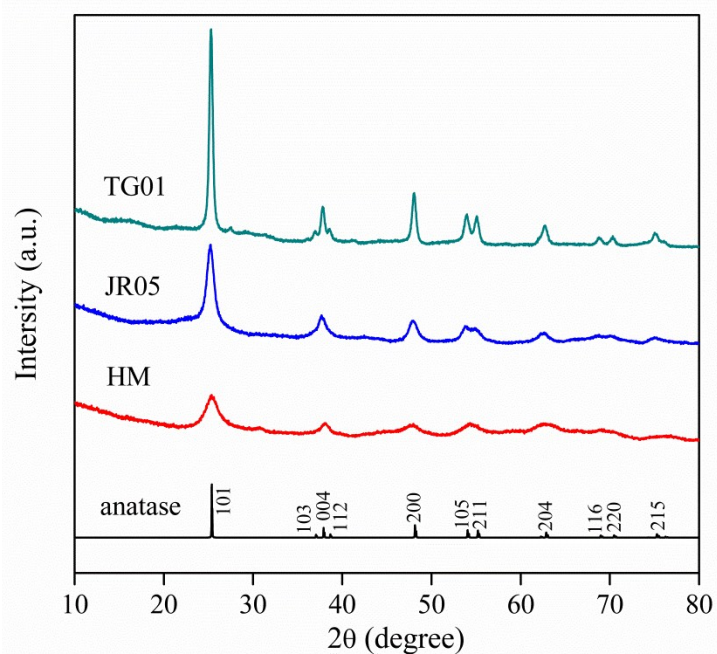

**Fig. S1.** The XRD patterns of three TiO<sub>2</sub> NPs and calculated diffraction patterns of bulk anatase (black).

## 2. BET surface area and BJH pore size distributions.

The N<sub>2</sub> adsorption-desorption isotherms and BJH pore size distributions of the three TiO<sub>2</sub> materials are presented in Fig. S2. The corresponding specific surface areas ( $S_{\text{BET}}$ ) determined by N<sub>2</sub> adsorption are listed in Table 1, and total pore volumes and particle sizes derived from BET are summarized in Table S1. The average particle

size derived from BET is given by equation:  $D=6000 / (S_{\text{BET}} \times \rho)$ , where  $\rho$  is true density (4.2 g/mL for titania).<sup>1</sup> The particle sizes obtained from BET show no significant difference from those derived from XRD. All TiO<sub>2</sub> materials exhibited N<sub>2</sub> adsorption-desorption isotherms of type IV according to IUPAC classification (Fig. S2a).<sup>2</sup> Hysteresis loops at  $P/P_0 > 0.5$  were observed for all TiO<sub>2</sub> samples, which indicate a high density of mesopores in these three materials. Fig. S2b shows that HM and JR05 have a narrow pore size distribution ranging from 3 to 8 nm with the peak located at *ca.* 4 nm, and TG01 has a broad pore size distribution ranging from 5 to 35 nm with the peak resolved at *ca.* 18 nm. Both the specific surface area and total pore volume of HM were larger than those of JR05, which can be attributable to the smaller particle size of HM (4.6 nm) than JR05 (7.5 nm).

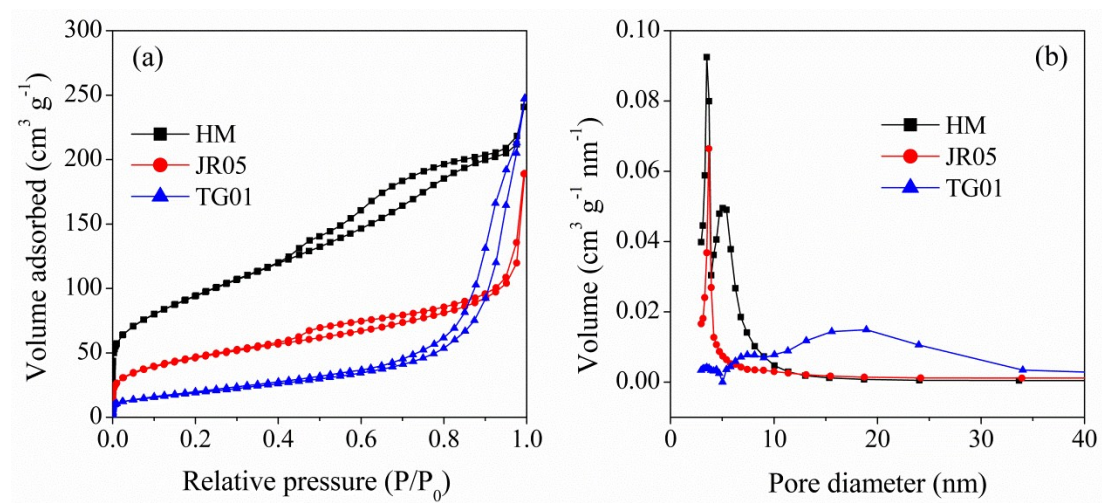

**Fig. S2.** (a) N<sub>2</sub> adsorption-desorption isotherms and (b) BJH pore size distribution curves of three TiO<sub>2</sub> NPs.

### 3. SEM and TEM analysis.

The SEM and TEM images of the three TiO<sub>2</sub> NPs are presented in Fig. S3. The SEM and TEM images demonstrate that the particle size of HM is about 5 nm (Fig.

S3a-c), and the measured lattice spacing of 3.5 Å indicates the presence of {101} facets.<sup>3</sup> JR05 exhibited a particle size of about 7 nm with two sets of lattice spacing of 3.5 and 1.9 Å, corresponding to {101} and {001} facets,<sup>4,5</sup> respectively (Fig. S3d-f). The SEM (Fig. S3g) and TEM (Fig. S3h-i) images of TG01 suggest that the material exposed {101} facets and the average particle size is about 20 nm.

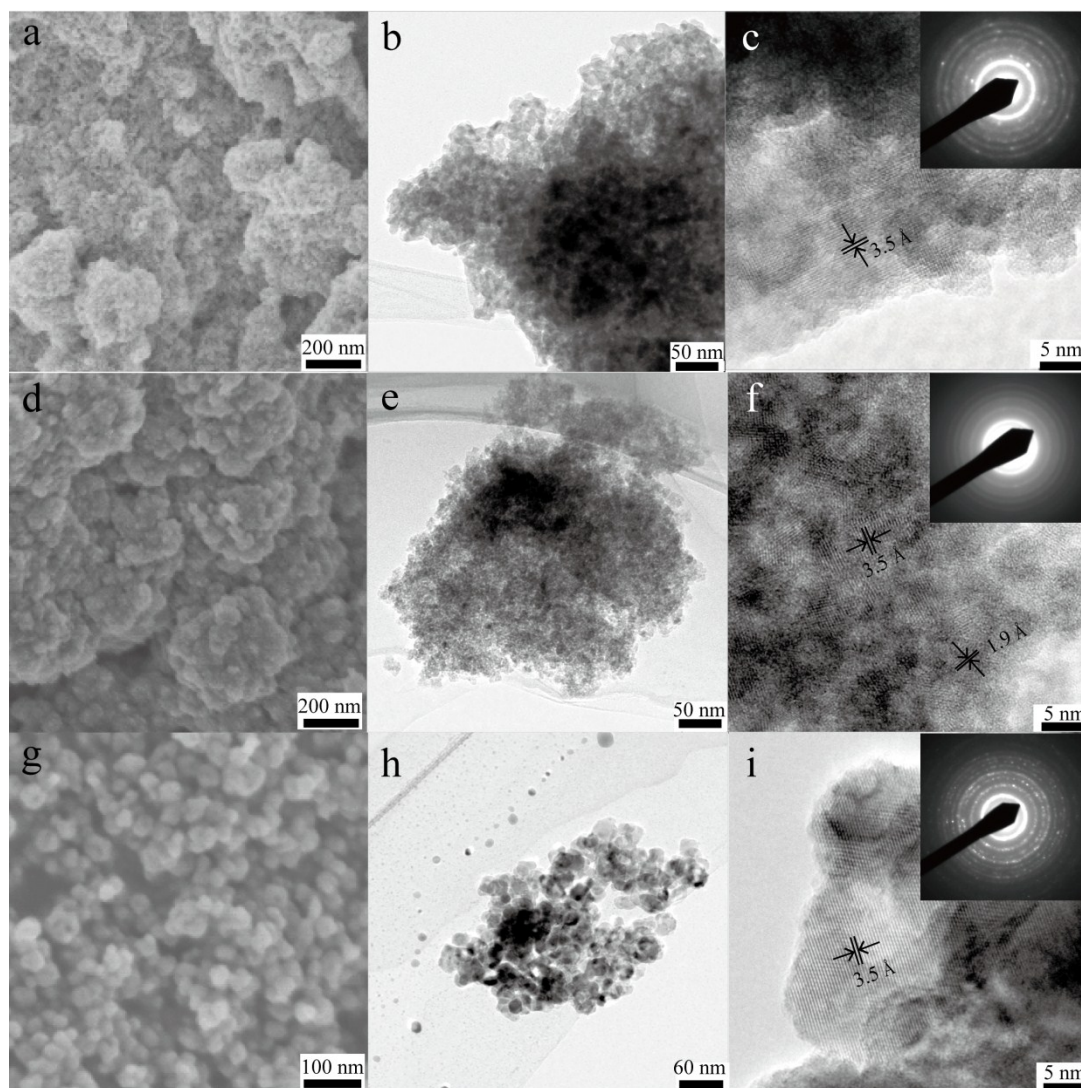

**Fig. S3.** FE-SEM and TEM images of three TiO<sub>2</sub>.

#### 4. X-ray photoelectron spectroscopy (XPS).

XPS was used to inspect the surface composition and chemical states of TiO<sub>2</sub>. The XPS spectra of three TiO<sub>2</sub> NPs exhibited prominent peaks of C, Ti, and O (Fig. S4). The XPS spectra of the Ti 2p core level region of all samples are shown in Fig. S4b. The two peaks at about 458.9 and 464.5 eV could be assigned to the Ti 2p<sub>3/2</sub> and Ti2p<sub>1/2</sub> spin orbital splitting photoelectrons in the Ti<sup>4+</sup> chemical state, respectively. The primary peak at 530.0 eV in O 1s spectra (Fig. S4c) of the samples was assigned to Ti-O-Ti (lattice O).<sup>6</sup>

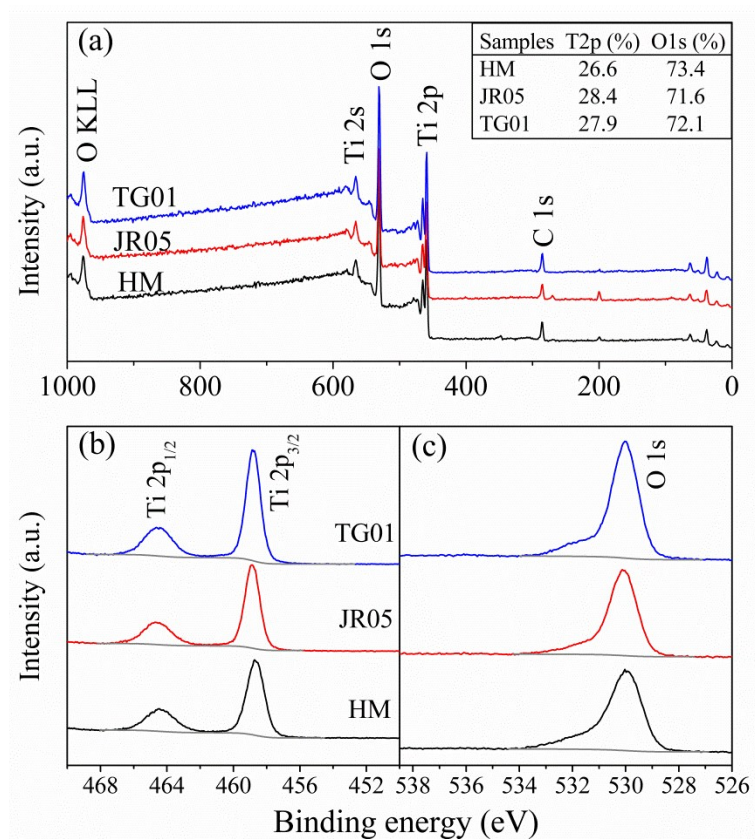

**Fig. S4.** XPS spectra of the three TiO<sub>2</sub> samples (a) with the inset showing their surface components, and of the core levels of Ti 2p (b), O 1s (1c).

## 5. Surface acid site determination.

FTIR spectroscopy of chemisorbed pyridine was performed to characterize the nature of the surface acid sites (Brønsted and Lewis).<sup>7</sup> Pyridine adsorbed on Brønsted acid sites exhibits characteristic IR bands around 1540 and 1635  $\text{cm}^{-1}$ , whereas the band at 1445  $\text{cm}^{-1}$  is assigned to pyridine coordinated with Lewis acid sites, which suggests that unsaturated  $\text{Ti}^{4+}$  sites are present on the  $\text{TiO}_2$  surface. FTIR spectra of pyridine adsorption on the three  $\text{TiO}_2$  NPs shown in Fig. S5a indicated that only Lewis acid sites existed on the  $\text{TiO}_2$  surface.

The total amount of acid sites and the acid strength were determined with the  $\text{NH}_3$ -TPD technique.<sup>8</sup> The  $\text{NH}_3$ -TPD profiles were acquired by Quantachrome TPRWinV3.51 (ChemBET Pulsar TPR/TPD, Quantachrome Instruments, U.S.). About 50 mg of sample was heated at 550 °C with a He gas flow (60 mL/min) for 1 h to remove water vapor and impurities. After being cooled to ambient temperature, the sample was exposed to a flow of  $\text{NH}_3$  gas at 60 mL/min for 1 h. After the saturation of  $\text{NH}_3$  adsorption, the sample was heated to 100°C in a flow of He (60 mL/min) and maintained at 100 °C for 1 h in order to desorb all physisorbed species. Then, the temperature was increased to 800 °C at a ramp rate of 10 °C/min.

The integrated area under the desorption peak of the  $\text{NH}_3$ -TPD profile gives the acid site concentration (mmol/g), which corresponds to the amount of  $\text{NH}_3$  bound to the acid sites on  $\text{TiO}_2$  surfaces. Moreover, the desorption temperature indicates the acid strength of the sites on the samples. The higher the temperature of desorption, the stronger the acidity, which leads to a higher affinity toward the reacting molecules.<sup>9</sup>

The NH<sub>3</sub>-TPD profiles of the three TiO<sub>2</sub> NPs are shown in Fig. 2, and the acid concentration is given in Table 1 in the main text. A broad TPD profile was observed for HM and TG01 with a NH<sub>3</sub> desorption peak at about 340 °C, which indicated a homogenous distribution of acid sites on the surface. In contrast, JR05 exhibited two distinct desorption peaks at 290 °C and 410 °C, which indicated that acid sites with different strength are heterogeneously distributed on the JR05 surface.



## 6. Model Building.

Anatase {001} and {101} facets were cleaved from the optimized bulk structure, six layers of atoms were extracted, and then a  $4 \times 2$  supercell was built. A vacuum slab of 15 Å was added to separate each slab in the direction along the surface normal.<sup>10</sup> All atoms were relaxed during the optimization. After  $\text{NH}_3$ ,  $\text{H}_3\text{AsO}_3$ , and  $\text{H}_2\text{AsO}_4^-$  molecules were individually geometry optimized in a periodic box of 10 Å side-lengths, they were added to the optimized anatase {001} and {101} facets to build the initial interfacial structure. Previous study indicates that  $\text{TiO}_2$  is a heterogeneous catalyst with water-tolerant Lewis acid sites,<sup>11</sup> which implies that  $\text{TiO}_2$  maintain their Lewis acidity even in water environment because water does not deactivate the Lewis acid sites. Therefore, DFT calculations of  $\text{NH}_3$  and As adsorption on  $\text{Ti}_{5c}$  Lewis acid sites from different facets were performed without addition of water molecules to compromise the computational consumption.

The adsorption energy,  $E_{\text{ads}}$  in eV, for each  $\text{NH}_3/\text{As}-\text{TiO}_2$  surface complex was calculated according to the following equation:<sup>12</sup>

$$E_{\text{ads}} = E_{\text{NH}_3/\text{As}+\text{surf}} - (E_{\text{surf}} + E_{\text{NH}_3/\text{As}})$$

where  $E_{\text{NH}_3/\text{As}+\text{surf}}$  is the total energy of the surface complexes, and  $E_{\text{surf}}$  and  $E_{\text{NH}_3/\text{As}}$  represent the energy of anatase facets and  $\text{NH}_3$  or As, respectively.

To investigate the surface distortion effect on electron transfer from subsurface  $\text{Ti}_{6c}$  sites to surface  $\text{Ti}_{5c}$  sites, the energy obtained from surface distortion upon adsorption was calculated by subtracting the original surface energy from the energy of distorted surface.

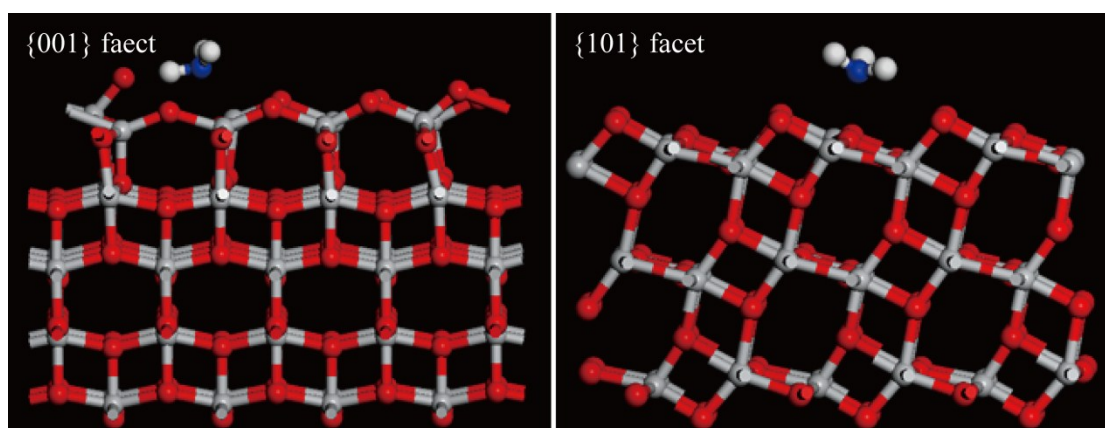

**Fig. S5.** Final NH<sub>3</sub> adsorption configurations on TiO<sub>2</sub> {001} and {101} facets. Ti: grey, O: red, N: blue, H: white.

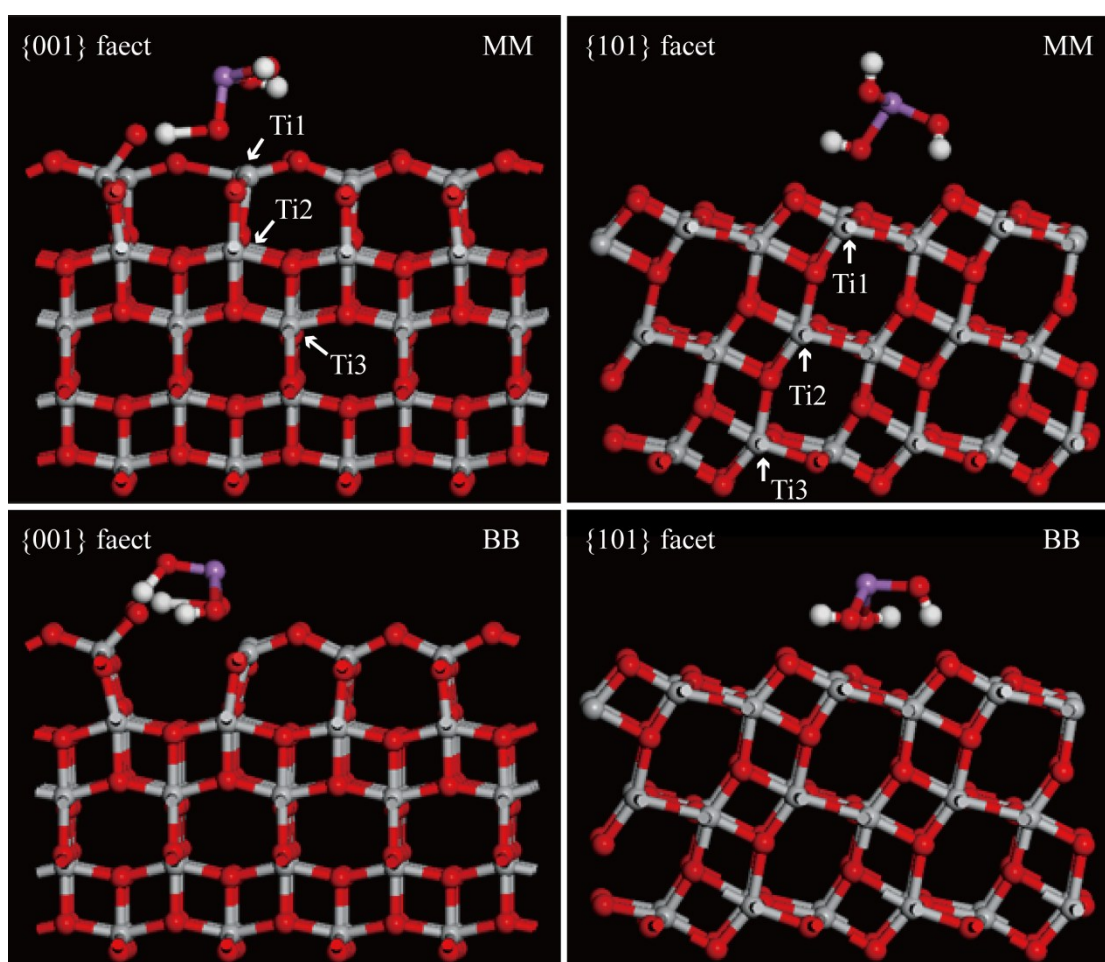

**Fig. S6.** Final As(III) adsorption configurations on TiO<sub>2</sub> {001} and {101} facets. Ti: grey, O: red, As: purple, H: white. The Ti1, Ti2, and Ti3 represented Ti atoms in the different atomic layers from surface to bulk region

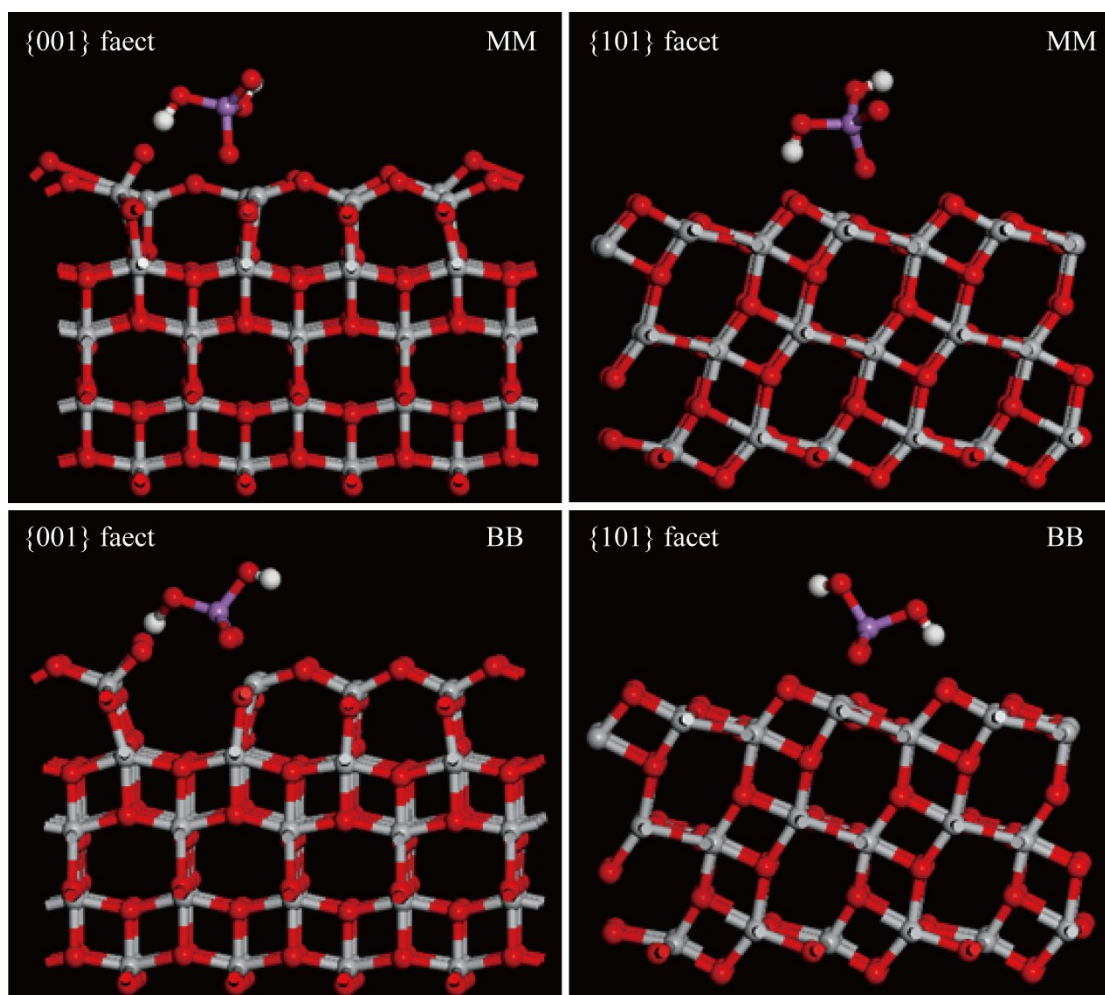

**Fig. S7.** Final As(V) adsorption configurations on TiO<sub>2</sub> {001} and {101} facets. Ti: grey, O: red, As: purple, H: white.

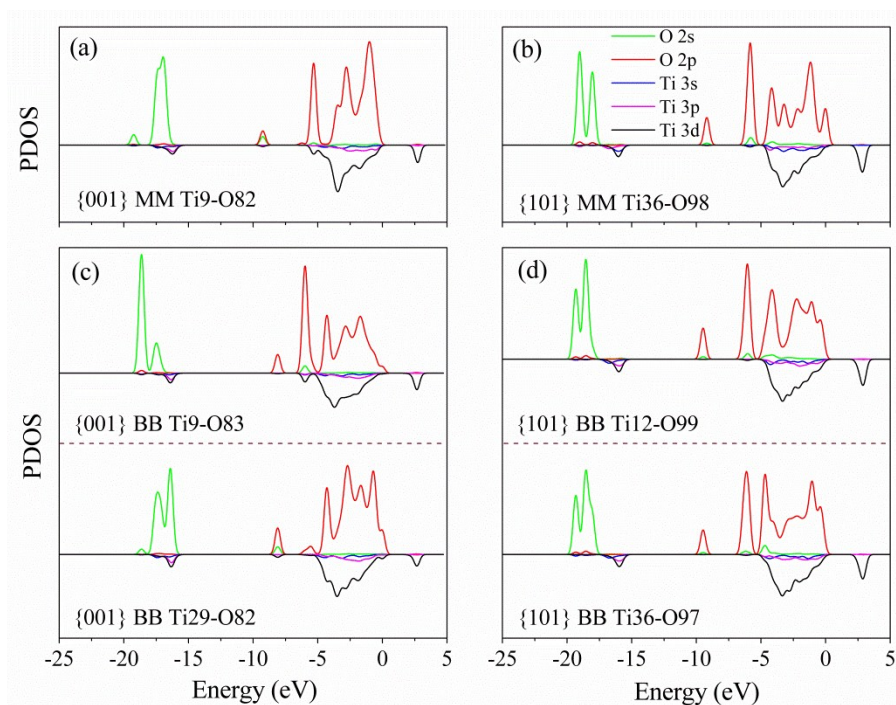

**Fig. S8.** PDOS analysis for As(III) adsorption configurations on  $\text{TiO}_2$ . (a) MM complex on  $\{001\}$  facet, (b) MM complex on  $\{101\}$  facet, (c) BB complex on  $\{001\}$  facet, (d) BB complex on  $\{101\}$  facet.

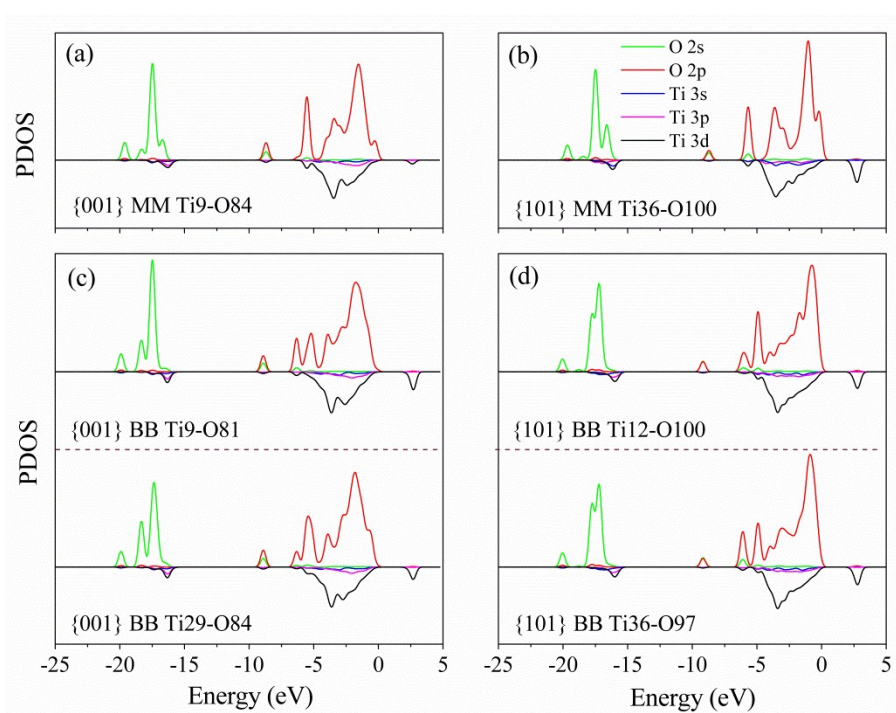

**Fig. S9.** PDOS analysis for As(V) adsorption configurations on  $\text{TiO}_2$ . (a) MM complex on  $\{001\}$  facet, (b) MM complex on  $\{101\}$  facet, (c) BB complex on  $\{001\}$  facet, (d) BB complex on  $\{101\}$  facet.

## 7. Raman analysis.

Raman measurements were performed on a Horiba JY HR800 Raman spectrometer (LabRAM HR Evolution, France) with exciting wavelength at 633 nm. Raman spectra of the three TiO<sub>2</sub> NPs are shown in Fig. 4a in the main text. All samples showed the characteristic peaks of TiO<sub>2</sub> at 144 (E<sub>g</sub>), 397 (B<sub>1g</sub>), 516 (A<sub>1g</sub>), 639 cm<sup>-1</sup> (E<sub>g</sub>).<sup>13, 14</sup> The percentage of exposed anatase TiO<sub>2</sub> facets has a relationship with the intensity variations of the Raman vibrational mode E<sub>g</sub> peak and A<sub>1g</sub> peak according to a previous study.<sup>15</sup> Therefore, the percentage of exposed {001} facets in anatase TiO<sub>2</sub> can be quantitatively obtained by measuring the peak intensity ratio of the E<sub>g</sub> and A<sub>1g</sub> peaks at 144 and 514 cm<sup>-1</sup>, respectively. Raman spectra measured at three different spots on each sample were averaged to quantify the peak intensity in this study. The percentage of exposed {001} facets is 4%, 17%, and 7% for HM, JR05, and TG01, respectively, as calculated in Table S3.

**Table S3.** Peak intensity and the ratio of the Raman vibrational modes between E<sub>g</sub> and A<sub>1g</sub>.

| TiO <sub>2</sub> Samples | Peak intensity of E <sub>g</sub> (144 cm <sup>-1</sup> ) | Peak intensity of A <sub>1g</sub> (514 cm <sup>-1</sup> ) | Percentage of {001} |
|--------------------------|----------------------------------------------------------|-----------------------------------------------------------|---------------------|
| HM                       | 14678.7                                                  | 550.7                                                     | 4%                  |
| JR05                     | 7923.5                                                   | 1358.5                                                    | 17%                 |
| TG01                     | 38333.0                                                  | 2663.0                                                    | 7%                  |

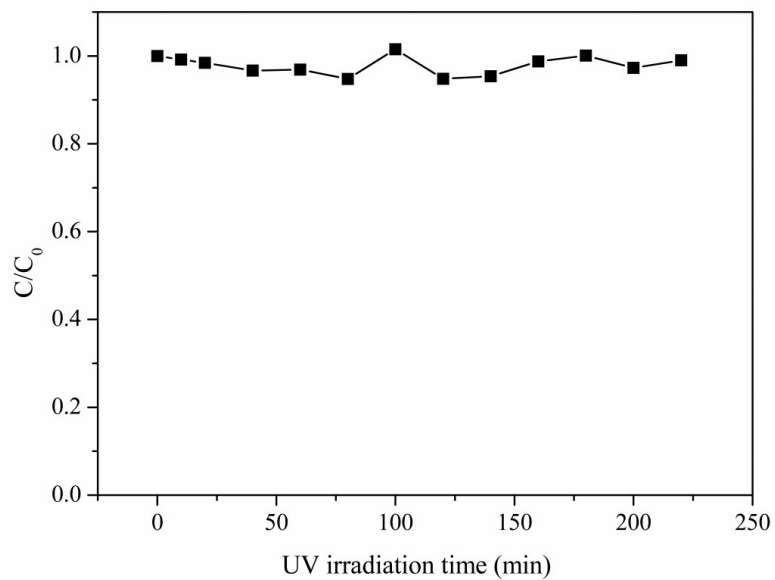

**Fig. S10.** As(III) oxidation kinetics in the absence of TiO<sub>2</sub>. Initial As(III) concentration was 14 mg/L; pH=7.

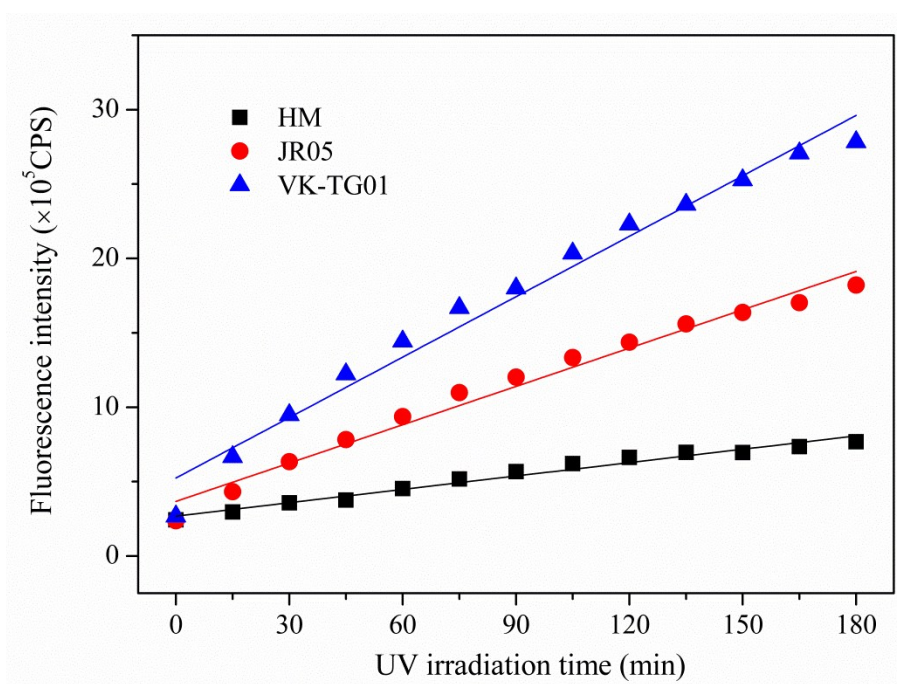

**Fig. S11.** Time dependence of the fluorescence intensity at 426 nm for three TiO<sub>2</sub> NPs.

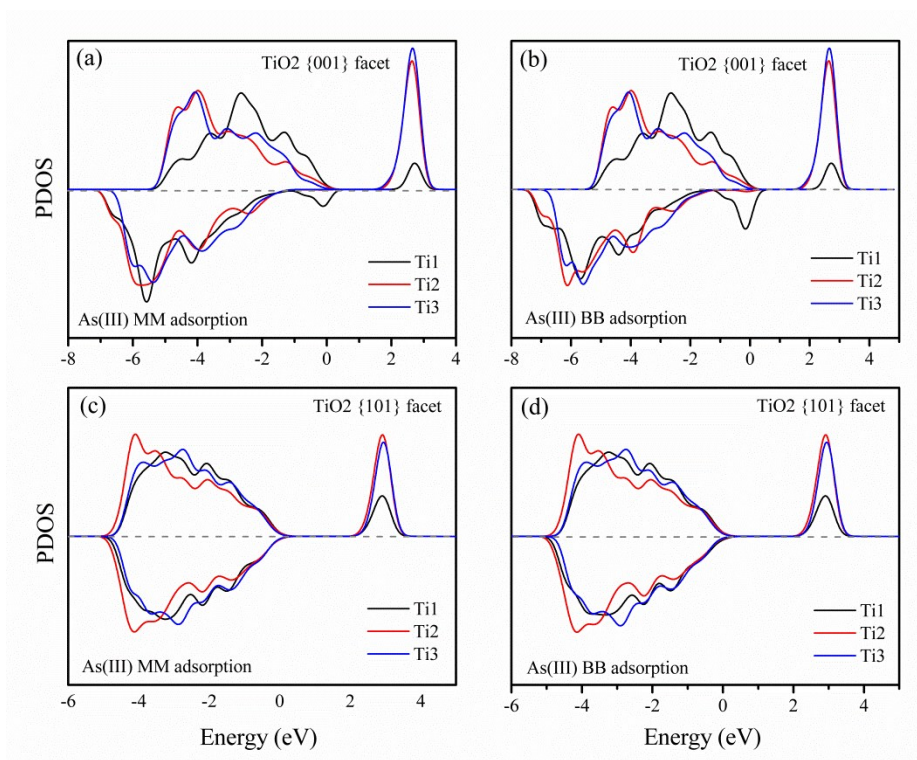

**Fig. S12.** PDOS for Ti atoms on  $\{001\}$  facets (a, b) and  $\{101\}$  facets (c, d) on the virgin surface (top half in each panel) and on the distorted surface upon As(III) adsorption (bottom half) in the first (Ti1), second (Ti2), and third (Ti3) atomic layers from surface to bulk (Fig. S6). Both MM (a, c) and BB (b, d) surface configurations are present.

## References

- 1 K. J. A. Raj and B. Viswanathan, *Indian J. Chem. A*, 2009, **48**, 1378-1382.
- 2 S. Brunauer, L. S. Deming, W. E. Deming and E. Teller, *J. Am. Chem. Soc.*, 1940, **62**, 1723-1732.
- 3 N. Roy, Y. Sohn and D. Pradhan, *ACS Nano*, 2013, **7**, 2532-2540.
- 4 H. G. Yang, C. H. Sun, S. Z. Qiao, J. Zou, G. Liu, S. C. Smith, H. M. Cheng and G. Q. Lu, *Nature*, 2008, **453**, 638-641.
- 5 J. Pan, G. Liu, G. Q. M. Lu and H. M. Cheng, *Angew. Chem. Int. Ed.*, 2011, **50**, 2133-2137.
- 6 C. Hua, F. Chen, T. Lu, C. Lian, S. Zheng, Q. Hu, S. Duo and R. Zhang, *Appl. Surf. Sci.*, 2014, **317**, 648-656.
- 7 Y. Ma, Q. Xu, X. Zong, D. Wang, G. Wu, X. Wang and C. Li, *Energy Environ. Sci.*, 2012, **5**, 6345-6351.
- 8 A. Bordoloi and S. B. Halligudi, *Appl. Catal., A: General*, 2010, **379**, 141-147.
- 9 S. M. Kemdeo, V. S. Sapkal and G. N. Chaudhari, *J. Mol. Catal. A: Chem.*, 2010, **323**, 70-77.
- 10 L. Yan, S. Hu, J. Duan and C. Jing, *J. Phys. Chem. A*, 2014, **118**, 4759-4765.
- 11 K. Nakajima, R. Noma, M. Kitano and M. Hara, *J. Phys. Chem. C*, 2013, **117**, 16028-16033.
- 12 Y.N. Guo, X. Lu, H.P. Zhang, J. Weng, F. Watari and Y. Leng, *J. Phys. Chem. C*, 2011, **115**, 18572-18581.
- 13 T. Ohsaka, F. Izumi and Y. Fujiki, *J. Raman Spectrosc.*, 1978, **7**, 321-324.
- 14 Z. Xu and X. Meng, *J. Hazard. Mater.*, 2009, **168**, 747-752.
- 15 F. Tian, Y. Zhang, J. Zhang and C. Pan, *J. Phys. Chem. C*, 2012, **116**, 7515-7519.



Detail of DFT calculations.

**Table S4.** DFT calculated adsorption energies.

| Molecule                        | Structure                                | $E_{\text{mole+surf}}^*$ (eV) | $E_{\text{surf}}^*$ (eV) | $E_{\text{mole}}^*$ (eV) | $E_{\text{ads}}$ (eV) |
|---------------------------------|------------------------------------------|-------------------------------|--------------------------|--------------------------|-----------------------|
| NH <sub>3</sub>                 | NH <sub>3</sub> -{001}                   | -99567.89                     | -99246.10                | -319.35                  | -2.43                 |
|                                 | NH <sub>3</sub> -{101}                   | -119422.78                    | -119102.29               | -319.35                  | -1.14                 |
| H <sub>3</sub> AsO <sub>3</sub> | H <sub>3</sub> AsO <sub>3</sub> -{001}MM | -100778.89                    | -99246.10                | -1530.30                 | -2.48                 |
|                                 | H <sub>3</sub> AsO <sub>3</sub> -{001}BB | -100780.65                    | -99246.10                | -1530.30                 | -4.24                 |
|                                 | H <sub>3</sub> AsO <sub>3</sub> -{101}MM | -120633.21                    | -119102.29               | -1530.30                 | -0.61                 |
|                                 | H <sub>3</sub> AsO <sub>3</sub> -{101}BB | -120633.47                    | -119102.29               | -1530.30                 | -0.88                 |
| H <sub>2</sub> AsO <sub>4</sub> | H <sub>2</sub> AsO <sub>4</sub> -{001}MM | -101196.01                    | -99246.10                | -1947.41                 | -2.50                 |
|                                 | H <sub>2</sub> AsO <sub>4</sub> -{001}BB | -101197.69                    | -99246.10                | -1947.41                 | -4.18                 |
|                                 | H <sub>2</sub> AsO <sub>4</sub> -{101}MM | -121050.33                    | -119102.29               | -1947.41                 | -0.64                 |
|                                 | H <sub>2</sub> AsO <sub>4</sub> -{101}BB | -121050.98                    | -119102.29               | -1947.41                 | -1.29                 |
| O <sub>2</sub>                  | O <sub>2</sub> -{001}                    | -100113.78                    | -99246.10                | -865.20                  | -2.48                 |
|                                 | O <sub>2</sub> -{101}                    | -119969.28                    | -119102.29               | -865.20                  | -1.79                 |

\*: The absolute energies obtained directly from the computational output files.

**Table S5.** DFT calculated energy for surface distortion.

| Structure                 | Surface | Original surface energy* (eV) | Distorted surface energy* (eV) | Energy for surface distortion (eV) |
|---------------------------|---------|-------------------------------|--------------------------------|------------------------------------|
| O <sub>2</sub> adsorption | {001}   | -99246.10                     | -99245.18                      | 0.92                               |
|                           | {101}   | -119102.29                    | -119101.49                     | 0.80                               |
| As(III) adsorption MM     | {001}   | -99246.10                     | -99244.84                      | 1.27                               |
|                           | {101}   | -119102.29                    | -119102.10                     | 0.19                               |
| As(III) adsorption BB     | {001}   | -99246.10                     | -99242.68                      | 3.42                               |
|                           | {101}   | -119102.29                    | -119101.86                     | 0.43                               |

\*: The absolute energies obtained directly from the computational output files.

The structural parameters for optimized adsorption structures:

NH<sub>3</sub>-{001}:

| Atom | Number | v       | w       | x       |
|------|--------|---------|---------|---------|
| H    | 1      | -0.7150 | -0.2246 | -0.5398 |
| H    | 2      | -0.6286 | -0.3303 | -0.5122 |
| H    | 3      | -0.6301 | -0.1124 | -0.5132 |
| N    | 1      | -0.6448 | -0.2231 | -0.5349 |
| O    | 1      | 0.1514  | -0.0030 | -0.0018 |
| O    | 2      | 0.1298  | 0.0454  | 0.3828  |
| O    | 3      | 0.0288  | 0.2772  | 0.1912  |
| O    | 4      | 0.1511  | 0.2912  | 0.0969  |
| O    | 5      | 0.0266  | 0.0319  | 0.2874  |
| O    | 6      | 0.0261  | 0.0282  | 0.1303  |
| O    | 7      | 0.1745  | 0.2770  | 0.3176  |
| O    | 8      | 0.0268  | 0.2484  | 0.0359  |
| O    | 9      | -0.0630 | 0.2772  | 0.4472  |
| O    | 10     | 0.1514  | 0.0257  | 0.2273  |
| O    | 11     | 0.3997  | -0.0022 | -0.0021 |
| O    | 12     | 0.4019  | 0.0194  | 0.3806  |
| O    | 13     | 0.2739  | 0.2770  | 0.1922  |
| O    | 14     | 0.4006  | 0.2905  | 0.0963  |
| O    | 15     | 0.2777  | 0.0083  | 0.2880  |
| O    | 16     | 0.2757  | 0.0282  | 0.1307  |
| O    | 17     | 0.4047  | 0.2769  | 0.3182  |
| O    | 18     | 0.2757  | 0.2481  | 0.0364  |
| O    | 19     | 0.2846  | 0.2774  | 0.4146  |
| O    | 20     | 0.3997  | 0.0292  | 0.2241  |
| O    | 21     | 0.6510  | -0.0017 | -0.0027 |
| O    | 22     | 0.6402  | 0.0256  | 0.3750  |
| O    | 23     | 0.5249  | 0.2770  | 0.1893  |
| O    | 24     | 0.6512  | 0.2906  | 0.0950  |
| O    | 25     | 0.5274  | 0.0289  | 0.2830  |
| O    | 26     | 0.5262  | 0.0280  | 0.1279  |
| O    | 27     | 0.6531  | 0.2769  | 0.3160  |
| O    | 28     | 0.5255  | 0.2508  | 0.0345  |
| O    | 29     | 0.5180  | 0.2772  | 0.4186  |
| O    | 30     | 0.6513  | 0.0266  | 0.2205  |
| O    | 31     | 0.9025  | -0.0025 | -0.0023 |
| O    | 32     | 0.8720  | 0.0253  | 0.3770  |
| O    | 33     | 0.7782  | 0.2772  | 0.1889  |
| O    | 34     | 0.9016  | 0.2910  | 0.0958  |
| O    | 35     | 0.7759  | 0.0322  | 0.2824  |

---

|   |    |         |        |         |
|---|----|---------|--------|---------|
| O | 36 | 0.7764  | 0.0282 | 0.1275  |
| O | 37 | 0.9037  | 0.2768 | 0.3187  |
| O | 38 | 0.7766  | 0.2510 | 0.0341  |
| O | 39 | 0.7399  | 0.2769 | 0.4254  |
| O | 40 | 0.9028  | 0.0266 | 0.2231  |
| O | 41 | 0.1514  | 0.4966 | -0.0018 |
| O | 42 | 0.1298  | 0.5086 | 0.3829  |
| O | 43 | 0.0288  | 0.7772 | 0.1914  |
| O | 44 | 0.1512  | 0.7910 | 0.0967  |
| O | 45 | 0.0266  | 0.5214 | 0.2874  |
| O | 46 | 0.0260  | 0.5282 | 0.1303  |
| O | 47 | 0.1485  | 0.7769 | 0.3250  |
| O | 48 | 0.0268  | 0.7486 | 0.0359  |
| O | 49 | -0.0101 | 0.7769 | 0.4227  |
| O | 50 | 0.1514  | 0.5292 | 0.2273  |
| O | 51 | 0.3997  | 0.4972 | -0.0020 |
| O | 52 | 0.4020  | 0.5344 | 0.3805  |
| O | 53 | 0.2749  | 0.7770 | 0.1910  |
| O | 54 | 0.4006  | 0.7909 | 0.0960  |
| O | 55 | 0.2777  | 0.5452 | 0.2880  |
| O | 56 | 0.2758  | 0.5278 | 0.1307  |
| O | 57 | 0.4168  | 0.7770 | 0.3174  |
| O | 58 | 0.2757  | 0.7481 | 0.0360  |
| O | 59 | 0.1796  | 0.7770 | 0.4529  |
| O | 60 | 0.3997  | 0.5255 | 0.2241  |
| O | 61 | 0.6510  | 0.4986 | -0.0027 |
| O | 62 | 0.6403  | 0.5284 | 0.3750  |
| O | 63 | 0.5239  | 0.7771 | 0.1895  |
| O | 64 | 0.6511  | 0.7906 | 0.0952  |
| O | 65 | 0.5274  | 0.5246 | 0.2830  |
| O | 66 | 0.5262  | 0.5281 | 0.1279  |
| O | 67 | 0.6599  | 0.7769 | 0.3148  |
| O | 68 | 0.5255  | 0.7508 | 0.0345  |
| O | 69 | 0.5377  | 0.7770 | 0.4198  |
| O | 70 | 0.6513  | 0.5283 | 0.2205  |
| O | 71 | 0.9025  | 0.4977 | -0.0023 |
| O | 72 | 0.8717  | 0.5284 | 0.3769  |
| O | 73 | 0.7780  | 0.7772 | 0.1892  |
| O | 74 | 0.9017  | 0.7909 | 0.0959  |
| O | 75 | 0.7759  | 0.5212 | 0.2824  |
| O | 76 | 0.7763  | 0.5283 | 0.1276  |
| O | 77 | 0.9038  | 0.7768 | 0.3184  |
| O | 78 | 0.7766  | 0.7511 | 0.0343  |
| O | 79 | 0.7618  | 0.7772 | 0.4197  |

---

---

|    |    |        |        |        |
|----|----|--------|--------|--------|
| O  | 80 | 0.9028 | 0.5285 | 0.2231 |
| Ti | 1  | 0.1477 | 0.0189 | 0.3047 |
| Ti | 2  | 0.0262 | 0.2724 | 0.1128 |
| Ti | 3  | 0.1512 | 0.2804 | 0.0212 |
| Ti | 4  | 0.1746 | 0.2771 | 0.3894 |
| Ti | 5  | 0.0256 | 0.0272 | 0.2082 |
| Ti | 6  | 0.3999 | 0.0210 | 0.3005 |
| Ti | 7  | 0.2760 | 0.2723 | 0.1131 |
| Ti | 8  | 0.4003 | 0.2808 | 0.0207 |
| Ti | 9  | 0.4074 | 0.2769 | 0.3915 |
| Ti | 10 | 0.2748 | 0.0261 | 0.2084 |
| Ti | 11 | 0.6507 | 0.0290 | 0.2992 |
| Ti | 12 | 0.5261 | 0.2722 | 0.1112 |
| Ti | 13 | 0.6512 | 0.2817 | 0.0198 |
| Ti | 14 | 0.6379 | 0.2770 | 0.3925 |
| Ti | 15 | 0.5275 | 0.0273 | 0.2060 |
| Ti | 16 | 0.8982 | 0.0337 | 0.3040 |
| Ti | 17 | 0.7762 | 0.2724 | 0.1110 |
| Ti | 18 | 0.9020 | 0.2812 | 0.0203 |
| Ti | 19 | 0.8627 | 0.2768 | 0.4010 |
| Ti | 20 | 0.7787 | 0.0270 | 0.2057 |
| Ti | 21 | 0.1477 | 0.5348 | 0.3046 |
| Ti | 22 | 0.0262 | 0.7724 | 0.1128 |
| Ti | 23 | 0.1512 | 0.7807 | 0.0211 |
| Ti | 24 | 0.1095 | 0.7770 | 0.4031 |
| Ti | 25 | 0.0256 | 0.5268 | 0.2082 |
| Ti | 26 | 0.3999 | 0.5329 | 0.3005 |
| Ti | 27 | 0.2760 | 0.7723 | 0.1128 |
| Ti | 28 | 0.4003 | 0.7812 | 0.0206 |
| Ti | 29 | 0.4311 | 0.7768 | 0.3945 |
| Ti | 30 | 0.2748 | 0.5275 | 0.2083 |
| Ti | 31 | 0.6507 | 0.5249 | 0.2992 |
| Ti | 32 | 0.5261 | 0.7722 | 0.1112 |
| Ti | 33 | 0.6511 | 0.7817 | 0.0199 |
| Ti | 34 | 0.6561 | 0.7770 | 0.3901 |
| Ti | 35 | 0.5275 | 0.5268 | 0.2059 |
| Ti | 36 | 0.8981 | 0.5197 | 0.3040 |
| Ti | 37 | 0.7762 | 0.7724 | 0.1110 |
| Ti | 38 | 0.9021 | 0.7811 | 0.0204 |
| Ti | 39 | 0.8822 | 0.7768 | 0.3928 |
| Ti | 40 | 0.7787 | 0.5273 | 0.2057 |

---

NH<sub>3</sub>-{101}:

| Atom | Number | v      | w      | x      |
|------|--------|--------|--------|--------|
| H    | 1      | 0.4297 | 0.8721 | 0.4571 |
| H    | 2      | 0.3882 | 0.6458 | 0.4652 |
| H    | 3      | 0.4644 | 0.7132 | 0.4454 |
| N    | 1      | 0.4224 | 0.7403 | 0.4416 |
| O    | 1      | 0.0107 | 0.3357 | 0.0566 |
| O    | 2      | 0.0840 | 0.4089 | 0.2011 |
| O    | 3      | 0.1587 | 0.4837 | 0.3555 |
| O    | 4      | 0.1540 | 0.4789 | 0.0990 |
| O    | 5      | 0.2300 | 0.0551 | 0.2422 |
| O    | 6      | 0.0578 | 0.1322 | 0.3838 |
| O    | 7      | 0.0814 | 0.1565 | 0.0296 |
| O    | 8      | 0.1567 | 0.2320 | 0.1830 |
| O    | 9      | 0.2298 | 0.3046 | 0.3284 |
| O    | 10     | 0.1826 | 0.0075 | 0.0007 |
| O    | 11     | 0.0103 | 0.0847 | 0.1428 |
| O    | 12     | 0.0870 | 0.1625 | 0.2856 |
| O    | 13     | 0.2606 | 0.3356 | 0.0566 |
| O    | 14     | 0.3347 | 0.4100 | 0.2028 |
| O    | 15     | 0.4095 | 0.4818 | 0.3548 |
| O    | 16     | 0.4034 | 0.4788 | 0.0987 |
| O    | 17     | 0.4805 | 0.0562 | 0.2412 |
| O    | 18     | 0.3083 | 0.1337 | 0.3839 |
| O    | 19     | 0.3310 | 0.1559 | 0.0291 |
| O    | 20     | 0.4062 | 0.2312 | 0.1822 |
| O    | 21     | 0.4802 | 0.3052 | 0.3267 |
| O    | 22     | 0.4323 | 0.0075 | 0.0004 |
| O    | 23     | 0.2608 | 0.0855 | 0.1428 |
| O    | 24     | 0.3366 | 0.1609 | 0.2854 |
| O    | 25     | 0.5105 | 0.3354 | 0.0558 |
| O    | 26     | 0.5843 | 0.4091 | 0.2010 |
| O    | 27     | 0.6586 | 0.4838 | 0.3557 |
| O    | 28     | 0.6536 | 0.4785 | 0.0988 |
| O    | 29     | 0.7301 | 0.0551 | 0.2423 |
| O    | 30     | 0.5567 | 0.1297 | 0.3832 |
| O    | 31     | 0.5812 | 0.1561 | 0.0292 |
| O    | 32     | 0.6568 | 0.2316 | 0.1827 |
| O    | 33     | 0.7293 | 0.3044 | 0.3285 |
| O    | 34     | 0.6828 | 0.0077 | 0.0006 |
| O    | 35     | 0.5106 | 0.0854 | 0.1419 |
| O    | 36     | 0.5873 | 0.1620 | 0.2851 |
| O    | 37     | 0.7605 | 0.3355 | 0.0564 |

---

|   |    |        |        |        |
|---|----|--------|--------|--------|
| O | 38 | 0.8341 | 0.4091 | 0.2020 |
| O | 39 | 0.9093 | 0.4844 | 0.3561 |
| O | 40 | 0.9034 | 0.4785 | 0.0992 |
| O | 41 | 0.9802 | 0.0554 | 0.2422 |
| O | 42 | 0.8076 | 0.1327 | 0.3843 |
| O | 43 | 0.8312 | 0.1562 | 0.0295 |
| O | 44 | 0.9064 | 0.2314 | 0.1831 |
| O | 45 | 0.9796 | 0.3046 | 0.3282 |
| O | 46 | 0.9327 | 0.0077 | 0.0010 |
| O | 47 | 0.7605 | 0.0855 | 0.1429 |
| O | 48 | 0.8369 | 0.1619 | 0.2862 |
| O | 49 | 0.0107 | 0.8357 | 0.0563 |
| O | 50 | 0.0846 | 0.9095 | 0.2016 |
| O | 51 | 0.1594 | 0.9844 | 0.3556 |
| O | 52 | 0.1537 | 0.9788 | 0.0990 |
| O | 53 | 0.2299 | 0.5549 | 0.2427 |
| O | 54 | 0.0578 | 0.6335 | 0.3838 |
| O | 55 | 0.0814 | 0.6562 | 0.0296 |
| O | 56 | 0.1567 | 0.7314 | 0.1830 |
| O | 57 | 0.2298 | 0.8051 | 0.3284 |
| O | 58 | 0.1828 | 0.5078 | 0.0010 |
| O | 59 | 0.0103 | 0.5858 | 0.1428 |
| O | 60 | 0.0870 | 0.6612 | 0.2856 |
| O | 61 | 0.2606 | 0.8354 | 0.0566 |
| O | 62 | 0.3347 | 0.9093 | 0.2027 |
| O | 63 | 0.4097 | 0.9875 | 0.3554 |
| O | 64 | 0.4034 | 0.9779 | 0.0987 |
| O | 65 | 0.4806 | 0.5551 | 0.2412 |
| O | 66 | 0.3053 | 0.6306 | 0.3862 |
| O | 67 | 0.3310 | 0.6559 | 0.0290 |
| O | 68 | 0.4067 | 0.7316 | 0.1831 |
| O | 69 | 0.4788 | 0.8040 | 0.3267 |
| O | 70 | 0.4323 | 0.5067 | 0.0004 |
| O | 71 | 0.2610 | 0.5859 | 0.1439 |
| O | 72 | 0.3367 | 0.6621 | 0.2887 |
| O | 73 | 0.5104 | 0.8353 | 0.0556 |
| O | 74 | 0.5842 | 0.9091 | 0.2010 |
| O | 75 | 0.6588 | 0.9839 | 0.3558 |
| O | 76 | 0.6536 | 0.9785 | 0.0988 |
| O | 77 | 0.7299 | 0.5550 | 0.2424 |
| O | 78 | 0.5564 | 0.6346 | 0.3832 |
| O | 79 | 0.5812 | 0.6561 | 0.0291 |
| O | 80 | 0.6567 | 0.7318 | 0.1827 |
| O | 81 | 0.7293 | 0.8043 | 0.3285 |

---

---

|    |    |         |        |        |
|----|----|---------|--------|--------|
| O  | 82 | 0.6827  | 0.5076 | 0.0006 |
| O  | 83 | 0.5106  | 0.5854 | 0.1419 |
| O  | 84 | 0.5873  | 0.6621 | 0.2850 |
| O  | 85 | 0.7605  | 0.8355 | 0.0564 |
| O  | 86 | 0.8341  | 0.9092 | 0.2020 |
| O  | 87 | 0.9093  | 0.9843 | 0.3561 |
| O  | 88 | 0.9034  | 0.9784 | 0.0992 |
| O  | 89 | 0.9802  | 0.5550 | 0.2422 |
| O  | 90 | 0.8075  | 0.6326 | 0.3843 |
| O  | 91 | 0.8312  | 0.6562 | 0.0294 |
| O  | 92 | 0.9063  | 0.7314 | 0.1832 |
| O  | 93 | 0.9795  | 0.8045 | 0.3279 |
| O  | 94 | 0.9327  | 0.5076 | 0.0010 |
| O  | 95 | 0.7605  | 0.5855 | 0.1429 |
| O  | 96 | 0.8367  | 0.6618 | 0.2862 |
| Ti | 1  | 0.1070  | 0.4319 | 0.0383 |
| Ti | 2  | 0.1767  | 0.0018 | 0.1807 |
| Ti | 3  | 0.2492  | 0.0741 | 0.3273 |
| Ti | 4  | -0.0090 | 0.0662 | 0.0576 |
| Ti | 5  | 0.0643  | 0.1402 | 0.2041 |
| Ti | 6  | 0.1340  | 0.2099 | 0.3464 |
| Ti | 7  | 0.3565  | 0.4316 | 0.0379 |
| Ti | 8  | 0.4265  | 0.0012 | 0.1800 |
| Ti | 9  | 0.4990  | 0.0736 | 0.3256 |
| Ti | 10 | 0.2409  | 0.0659 | 0.0573 |
| Ti | 11 | 0.3139  | 0.1386 | 0.2041 |
| Ti | 12 | 0.3837  | 0.2087 | 0.3458 |
| Ti | 13 | 0.6068  | 0.4317 | 0.0380 |
| Ti | 14 | 0.6772  | 0.0023 | 0.1806 |
| Ti | 15 | 0.7493  | 0.0742 | 0.3277 |
| Ti | 16 | 0.4909  | 0.0658 | 0.0569 |
| Ti | 17 | 0.5640  | 0.1389 | 0.2031 |
| Ti | 18 | 0.6332  | 0.2081 | 0.3463 |
| Ti | 19 | 0.8568  | 0.4318 | 0.0383 |
| Ti | 20 | 0.9270  | 0.0021 | 0.1809 |
| Ti | 21 | 0.9995  | 0.0743 | 0.3273 |
| Ti | 22 | 0.7410  | 0.0660 | 0.0574 |
| Ti | 23 | 0.8140  | 0.1389 | 0.2044 |
| Ti | 24 | 0.8838  | 0.2088 | 0.3470 |
| Ti | 25 | 0.1068  | 0.9317 | 0.0382 |
| Ti | 26 | 0.1783  | 0.5034 | 0.1806 |
| Ti | 27 | 0.2507  | 0.5757 | 0.3279 |
| Ti | 28 | -0.0090 | 0.5660 | 0.0576 |
| Ti | 29 | 0.0643  | 0.6382 | 0.2041 |

---

|    |    |        |        |        |
|----|----|--------|--------|--------|
| Ti | 30 | 0.1340 | 0.7079 | 0.3464 |
| Ti | 31 | 0.3565 | 0.9312 | 0.0379 |
| Ti | 32 | 0.4264 | 0.5019 | 0.1799 |
| Ti | 33 | 0.4988 | 0.5737 | 0.3252 |
| Ti | 34 | 0.2410 | 0.5659 | 0.0579 |
| Ti | 35 | 0.3144 | 0.6393 | 0.2074 |
| Ti | 36 | 0.3850 | 0.7104 | 0.3529 |
| Ti | 37 | 0.6069 | 0.9318 | 0.0379 |
| Ti | 38 | 0.6771 | 0.5021 | 0.1806 |
| Ti | 39 | 0.7492 | 0.5743 | 0.3277 |
| Ti | 40 | 0.4910 | 0.5659 | 0.0568 |
| Ti | 41 | 0.5640 | 0.6389 | 0.2030 |
| Ti | 42 | 0.6330 | 0.7082 | 0.3464 |
| Ti | 43 | 0.8568 | 0.9317 | 0.0383 |
| Ti | 44 | 0.9270 | 0.5022 | 0.1809 |
| Ti | 45 | 0.9995 | 0.5746 | 0.3273 |
| Ti | 46 | 0.7410 | 0.5660 | 0.0574 |
| Ti | 47 | 0.8139 | 0.6389 | 0.2044 |
| Ti | 48 | 0.8836 | 0.7087 | 0.3470 |

H<sub>3</sub>AsO<sub>3</sub>-{001} MM:

| Atom | Number | v       | w       | x       |
|------|--------|---------|---------|---------|
| H    | 1      | 0.4666  | 0.0903  | 0.5467  |
| H    | 2      | 0.2464  | 0.2736  | 0.4588  |
| H    | 3      | 0.4905  | 0.5271  | 0.5177  |
| O    | 1      | 0.1514  | -0.0031 | -0.0005 |
| O    | 2      | 0.1323  | 0.0268  | 0.3827  |
| O    | 3      | 0.0280  | 0.2773  | 0.1921  |
| O    | 4      | 0.1509  | 0.2914  | 0.0981  |
| O    | 5      | 0.0248  | 0.0268  | 0.2868  |
| O    | 6      | 0.0258  | 0.0283  | 0.1308  |
| O    | 7      | 0.1445  | 0.2775  | 0.3236  |
| O    | 8      | 0.0261  | 0.2494  | 0.0368  |
| O    | 9      | -0.0038 | 0.2777  | 0.4212  |
| O    | 10     | 0.1515  | 0.0278  | 0.2276  |
| O    | 11     | 0.3996  | -0.0033 | -0.0004 |
| O    | 12     | 0.4021  | 0.0316  | 0.3848  |
| O    | 13     | 0.2758  | 0.2775  | 0.1932  |
| O    | 14     | 0.4000  | 0.2917  | 0.0981  |
| O    | 15     | 0.2758  | 0.0365  | 0.2905  |
| O    | 16     | 0.2754  | 0.0285  | 0.1327  |
| O    | 17     | 0.4097  | 0.2771  | 0.3232  |



---

|   |    |        |         |         |
|---|----|--------|---------|---------|
| O | 18 | 0.2755 | 0.2478  | 0.0377  |
| O | 19 | 0.1806 | 0.2772  | 0.4575  |
| O | 20 | 0.3992 | 0.0272  | 0.2281  |
| O | 21 | 0.6494 | -0.0023 | -0.0008 |
| O | 22 | 0.6475 | 0.0285  | 0.3785  |
| O | 23 | 0.5222 | 0.2775  | 0.1924  |
| O | 24 | 0.6499 | 0.2907  | 0.0974  |
| O | 25 | 0.5262 | 0.0273  | 0.2872  |
| O | 26 | 0.5249 | 0.0285  | 0.1311  |
| O | 27 | 0.6577 | 0.2777  | 0.3177  |
| O | 28 | 0.5246 | 0.2491  | 0.0370  |
| O | 29 | 0.5415 | 0.2800  | 0.4221  |
| O | 30 | 0.6491 | 0.0276  | 0.2235  |
| O | 31 | 0.9013 | -0.0023 | -0.0009 |
| O | 32 | 0.8839 | 0.0280  | 0.3776  |
| O | 33 | 0.7751 | 0.2772  | 0.1908  |
| O | 34 | 0.9008 | 0.2908  | 0.0972  |
| O | 35 | 0.7753 | 0.0243  | 0.2838  |
| O | 36 | 0.7755 | 0.0283  | 0.1290  |
| O | 37 | 0.8985 | 0.2774  | 0.3174  |
| O | 38 | 0.7753 | 0.2507  | 0.0360  |
| O | 39 | 0.7689 | 0.2777  | 0.4199  |
| O | 40 | 0.9011 | 0.0273  | 0.2233  |
| O | 41 | 0.1514 | 0.4970  | -0.0005 |
| O | 42 | 0.1322 | 0.5284  | 0.3827  |
| O | 43 | 0.0281 | 0.7772  | 0.1921  |
| O | 44 | 0.1508 | 0.7913  | 0.0982  |
| O | 45 | 0.0248 | 0.5279  | 0.2868  |
| O | 46 | 0.0258 | 0.5283  | 0.1308  |
| O | 47 | 0.1580 | 0.7775  | 0.3214  |
| O | 48 | 0.0261 | 0.7494  | 0.0369  |
| O | 49 | 0.0019 | 0.7777  | 0.4191  |
| O | 50 | 0.1515 | 0.5275  | 0.2276  |
| O | 51 | 0.3996 | 0.4970  | -0.0004 |
| O | 52 | 0.4020 | 0.5227  | 0.3845  |
| O | 53 | 0.2756 | 0.7775  | 0.1937  |
| O | 54 | 0.4000 | 0.7914  | 0.0982  |
| O | 55 | 0.2758 | 0.5180  | 0.2905  |
| O | 56 | 0.2754 | 0.5286  | 0.1327  |
| O | 57 | 0.4061 | 0.7772  | 0.3232  |
| O | 58 | 0.2755 | 0.7479  | 0.0379  |
| O | 59 | 0.2656 | 0.7778  | 0.4151  |
| O | 60 | 0.3992 | 0.5281  | 0.2280  |
| O | 61 | 0.6494 | 0.4974  | -0.0008 |

---

---

|    |    |        |        |         |
|----|----|--------|--------|---------|
| O  | 62 | 0.6481 | 0.5273 | 0.3785  |
| O  | 63 | 0.5226 | 0.7775 | 0.1923  |
| O  | 64 | 0.6499 | 0.7910 | 0.0973  |
| O  | 65 | 0.5263 | 0.5277 | 0.2872  |
| O  | 66 | 0.5250 | 0.5285 | 0.1311  |
| O  | 67 | 0.6560 | 0.7779 | 0.3182  |
| O  | 68 | 0.5247 | 0.7492 | 0.0370  |
| O  | 69 | 0.5235 | 0.7769 | 0.4181  |
| O  | 70 | 0.6492 | 0.5276 | 0.2235  |
| O  | 71 | 0.9013 | 0.4976 | -0.0009 |
| O  | 72 | 0.8839 | 0.5269 | 0.3776  |
| O  | 73 | 0.7750 | 0.7771 | 0.1905  |
| O  | 74 | 0.9008 | 0.7908 | 0.0972  |
| O  | 75 | 0.7754 | 0.5306 | 0.2838  |
| O  | 76 | 0.7754 | 0.5281 | 0.1290  |
| O  | 77 | 0.9041 | 0.7774 | 0.3177  |
| O  | 78 | 0.7753 | 0.7508 | 0.0359  |
| O  | 79 | 0.7628 | 0.7779 | 0.4197  |
| O  | 80 | 0.9011 | 0.5275 | 0.2232  |
| O  | 81 | 0.4754 | 0.2181 | 0.5464  |
| O  | 82 | 0.3620 | 0.2786 | 0.4644  |
| O  | 83 | 0.4289 | 0.5433 | 0.5284  |
| Ti | 1  | 0.1483 | 0.0319 | 0.3062  |
| Ti | 2  | 0.0257 | 0.2724 | 0.1137  |
| Ti | 3  | 0.1511 | 0.2809 | 0.0224  |
| Ti | 4  | 0.1115 | 0.2776 | 0.4013  |
| Ti | 5  | 0.0268 | 0.0270 | 0.2089  |
| Ti | 6  | 0.3989 | 0.0334 | 0.3064  |
| Ti | 7  | 0.2754 | 0.2727 | 0.1149  |
| Ti | 8  | 0.3998 | 0.2808 | 0.0225  |
| Ti | 9  | 0.4294 | 0.2766 | 0.4035  |
| Ti | 10 | 0.2752 | 0.0276 | 0.2105  |
| Ti | 11 | 0.6496 | 0.0261 | 0.3014  |
| Ti | 12 | 0.5250 | 0.2726 | 0.1140  |
| Ti | 13 | 0.6495 | 0.2810 | 0.0219  |
| Ti | 14 | 0.6583 | 0.2777 | 0.3926  |
| Ti | 15 | 0.5236 | 0.0272 | 0.2092  |
| Ti | 16 | 0.8987 | 0.0246 | 0.3016  |
| Ti | 17 | 0.7754 | 0.2725 | 0.1124  |
| Ti | 18 | 0.9011 | 0.2811 | 0.0218  |
| Ti | 19 | 0.8846 | 0.2774 | 0.3921  |
| Ti | 20 | 0.7755 | 0.0269 | 0.2070  |
| Ti | 21 | 0.1483 | 0.5231 | 0.3062  |
| Ti | 22 | 0.0257 | 0.7724 | 0.1137  |

---

|    |    |        |        |        |
|----|----|--------|--------|--------|
| Ti | 23 | 0.1511 | 0.7807 | 0.0225 |
| Ti | 24 | 0.1554 | 0.7776 | 0.3958 |
| Ti | 25 | 0.0268 | 0.5272 | 0.2089 |
| Ti | 26 | 0.3989 | 0.5211 | 0.3063 |
| Ti | 27 | 0.2754 | 0.7727 | 0.1150 |
| Ti | 28 | 0.3998 | 0.7807 | 0.0225 |
| Ti | 29 | 0.4118 | 0.7760 | 0.3969 |
| Ti | 30 | 0.2752 | 0.5271 | 0.2106 |
| Ti | 31 | 0.6497 | 0.5296 | 0.3014 |
| Ti | 32 | 0.5251 | 0.7726 | 0.1139 |
| Ti | 33 | 0.6496 | 0.7811 | 0.0219 |
| Ti | 34 | 0.6551 | 0.7780 | 0.3943 |
| Ti | 35 | 0.5237 | 0.5275 | 0.2092 |
| Ti | 36 | 0.8987 | 0.5302 | 0.3016 |
| Ti | 37 | 0.7754 | 0.7725 | 0.1124 |
| Ti | 38 | 0.9011 | 0.7811 | 0.0218 |
| Ti | 39 | 0.8964 | 0.7774 | 0.3947 |
| Ti | 40 | 0.7755 | 0.5270 | 0.2070 |
| As | 1  | 0.3750 | 0.3348 | 0.5328 |

H<sub>3</sub>AsO<sub>3</sub>-{001} BB:

| Atom | Number | v       | w       | x       |
|------|--------|---------|---------|---------|
| H    | 1      | 0.2021  | 0.3908  | 0.4806  |
| H    | 2      | 0.2382  | 0.7527  | 0.4648  |
| H    | 3      | 0.3001  | 0.2841  | 0.4520  |
| O    | 1      | 0.1520  | -0.0003 | -0.0008 |
| O    | 2      | 0.1178  | 0.0367  | 0.3813  |
| O    | 3      | 0.0294  | 0.2803  | 0.1912  |
| O    | 4      | 0.1511  | 0.2940  | 0.0978  |
| O    | 5      | 0.0238  | 0.0311  | 0.2853  |
| O    | 6      | 0.0257  | 0.0312  | 0.1298  |
| O    | 7      | 0.1488  | 0.2843  | 0.3243  |
| O    | 8      | 0.0265  | 0.2525  | 0.0362  |
| O    | 9      | -0.0045 | 0.2844  | 0.4238  |
| O    | 10     | 0.1520  | 0.0312  | 0.2278  |
| O    | 11     | 0.3991  | -0.0011 | -0.0007 |
| O    | 12     | 0.4195  | 0.0240  | 0.3871  |
| O    | 13     | 0.2765  | 0.2795  | 0.1938  |
| O    | 14     | 0.3999  | 0.2930  | 0.0980  |
| O    | 15     | 0.2753  | 0.0306  | 0.2920  |
| O    | 16     | 0.2756  | 0.0306  | 0.1332  |
| O    | 17     | 0.4063  | 0.2729  | 0.3249  |

---

|   |    |         |         |         |
|---|----|---------|---------|---------|
| O | 18 | 0.2755  | 0.2497  | 0.0379  |
| O | 19 | 0.1916  | 0.2965  | 0.4522  |
| O | 20 | 0.3990  | 0.0267  | 0.2294  |
| O | 21 | 0.6490  | -0.0002 | -0.0016 |
| O | 22 | 0.6628  | 0.0272  | 0.3765  |
| O | 23 | 0.5214  | 0.2779  | 0.1919  |
| O | 24 | 0.6499  | 0.2915  | 0.0965  |
| O | 25 | 0.5267  | 0.0240  | 0.2873  |
| O | 26 | 0.5247  | 0.0294  | 0.1308  |
| O | 27 | 0.6544  | 0.2773  | 0.3166  |
| O | 28 | 0.5244  | 0.2506  | 0.0366  |
| O | 29 | 0.5539  | 0.2719  | 0.4230  |
| O | 30 | 0.6488  | 0.0289  | 0.2223  |
| O | 31 | 0.9017  | 0.0005  | -0.0016 |
| O | 32 | 0.8857  | 0.0311  | 0.3760  |
| O | 33 | 0.7755  | 0.2787  | 0.1894  |
| O | 34 | 0.9008  | 0.2934  | 0.0963  |
| O | 35 | 0.7757  | 0.0289  | 0.2820  |
| O | 36 | 0.7755  | 0.0299  | 0.1277  |
| O | 37 | 0.8991  | 0.2804  | 0.3166  |
| O | 38 | 0.7754  | 0.2535  | 0.0348  |
| O | 39 | 0.7750  | 0.2791  | 0.4222  |
| O | 40 | 0.9014  | 0.0298  | 0.2215  |
| O | 41 | 0.1519  | 0.4996  | -0.0008 |
| O | 42 | 0.1176  | 0.5346  | 0.3814  |
| O | 43 | 0.0294  | 0.7801  | 0.1912  |
| O | 44 | 0.1511  | 0.7941  | 0.0978  |
| O | 45 | 0.0241  | 0.5322  | 0.2854  |
| O | 46 | 0.0259  | 0.5312  | 0.1299  |
| O | 47 | 0.1484  | 0.7842  | 0.3243  |
| O | 48 | 0.0265  | 0.7527  | 0.0361  |
| O | 49 | -0.0075 | 0.7835  | 0.4238  |
| O | 50 | 0.1524  | 0.5309  | 0.2281  |
| O | 51 | 0.3993  | 0.4985  | -0.0007 |
| O | 52 | 0.4364  | 0.5234  | 0.3804  |
| O | 53 | 0.2760  | 0.7794  | 0.1937  |
| O | 54 | 0.3999  | 0.7932  | 0.0980  |
| O | 55 | 0.2765  | 0.5285  | 0.2922  |
| O | 56 | 0.2755  | 0.5305  | 0.1331  |
| O | 57 | 0.4023  | 0.7760  | 0.3260  |
| O | 58 | 0.2755  | 0.7495  | 0.0378  |
| O | 59 | 0.1795  | 0.7931  | 0.4535  |
| O | 60 | 0.3997  | 0.5293  | 0.2284  |
| O | 61 | 0.6489  | 0.4997  | -0.0014 |

---

---

|    |    |        |        |         |
|----|----|--------|--------|---------|
| O  | 62 | 0.6617 | 0.5268 | 0.3767  |
| O  | 63 | 0.5221 | 0.7782 | 0.1916  |
| O  | 64 | 0.6498 | 0.7929 | 0.0964  |
| O  | 65 | 0.5280 | 0.5292 | 0.2855  |
| O  | 66 | 0.5254 | 0.5293 | 0.1301  |
| O  | 67 | 0.6553 | 0.7769 | 0.3169  |
| O  | 68 | 0.5244 | 0.7515 | 0.0364  |
| O  | 69 | 0.5537 | 0.7780 | 0.4239  |
| O  | 70 | 0.6499 | 0.5278 | 0.2218  |
| O  | 71 | 0.9016 | 0.5006 | -0.0016 |
| O  | 72 | 0.8858 | 0.5303 | 0.3760  |
| O  | 73 | 0.7752 | 0.7790 | 0.1894  |
| O  | 74 | 0.9008 | 0.7930 | 0.0962  |
| O  | 75 | 0.7759 | 0.5287 | 0.2821  |
| O  | 76 | 0.7754 | 0.5300 | 0.1277  |
| O  | 77 | 0.8984 | 0.7805 | 0.3166  |
| O  | 78 | 0.7753 | 0.7538 | 0.0348  |
| O  | 79 | 0.7737 | 0.7786 | 0.4229  |
| O  | 80 | 0.9018 | 0.5296 | 0.2215  |
| O  | 81 | 0.2546 | 0.5188 | 0.5178  |
| O  | 82 | 0.3709 | 0.7134 | 0.4594  |
| O  | 83 | 0.3656 | 0.3132 | 0.4564  |
| Ti | 1  | 0.1486 | 0.0335 | 0.3070  |
| Ti | 2  | 0.0258 | 0.2754 | 0.1129  |
| Ti | 3  | 0.1515 | 0.2833 | 0.0221  |
| Ti | 4  | 0.1098 | 0.2854 | 0.4008  |
| Ti | 5  | 0.0279 | 0.0300 | 0.2080  |
| Ti | 6  | 0.3989 | 0.0234 | 0.3073  |
| Ti | 7  | 0.2755 | 0.2749 | 0.1150  |
| Ti | 8  | 0.3995 | 0.2826 | 0.0222  |
| Ti | 9  | 0.4430 | 0.2724 | 0.3991  |
| Ti | 10 | 0.2751 | 0.0294 | 0.2109  |
| Ti | 11 | 0.6504 | 0.0263 | 0.2997  |
| Ti | 12 | 0.5251 | 0.2733 | 0.1133  |
| Ti | 13 | 0.6493 | 0.2828 | 0.0211  |
| Ti | 14 | 0.6657 | 0.2768 | 0.3920  |
| Ti | 15 | 0.5233 | 0.0279 | 0.2088  |
| Ti | 16 | 0.8994 | 0.0302 | 0.2997  |
| Ti | 17 | 0.7754 | 0.2743 | 0.1112  |
| Ti | 18 | 0.9014 | 0.2840 | 0.0209  |
| Ti | 19 | 0.8869 | 0.2808 | 0.3924  |
| Ti | 20 | 0.7762 | 0.0289 | 0.2056  |
| Ti | 21 | 0.1499 | 0.5333 | 0.3069  |
| Ti | 22 | 0.0257 | 0.7751 | 0.1129  |

---

|    |    |        |        |        |
|----|----|--------|--------|--------|
| Ti | 23 | 0.1515 | 0.7836 | 0.0221 |
| Ti | 24 | 0.1072 | 0.7856 | 0.4002 |
| Ti | 25 | 0.0280 | 0.5301 | 0.2081 |
| Ti | 26 | 0.4019 | 0.5287 | 0.3065 |
| Ti | 27 | 0.2755 | 0.7745 | 0.1151 |
| Ti | 28 | 0.3994 | 0.7826 | 0.0222 |
| Ti | 29 | 0.4398 | 0.7698 | 0.4034 |
| Ti | 30 | 0.2758 | 0.5292 | 0.2111 |
| Ti | 31 | 0.6517 | 0.5276 | 0.2997 |
| Ti | 32 | 0.5251 | 0.7737 | 0.1132 |
| Ti | 33 | 0.6493 | 0.7834 | 0.0210 |
| Ti | 34 | 0.6642 | 0.7771 | 0.3927 |
| Ti | 35 | 0.5242 | 0.5281 | 0.2082 |
| Ti | 36 | 0.9001 | 0.5306 | 0.2997 |
| Ti | 37 | 0.7754 | 0.7746 | 0.1112 |
| Ti | 38 | 0.9014 | 0.7838 | 0.0209 |
| Ti | 39 | 0.8852 | 0.7805 | 0.3924 |
| Ti | 40 | 0.7761 | 0.5287 | 0.2054 |
| As | 1  | 0.3623 | 0.5307 | 0.5081 |

H<sub>3</sub>AsO<sub>3</sub>-{101} MM:

| Atom | Number | v      | w      | x      |
|------|--------|--------|--------|--------|
| H    | 1      | 0.4301 | 0.5203 | 0.5647 |
| H    | 2      | 0.3627 | 0.6651 | 0.4558 |
| H    | 3      | 0.5333 | 0.7198 | 0.4447 |
| O    | 1      | 0.0086 | 0.3345 | 0.0563 |
| O    | 2      | 0.0821 | 0.4082 | 0.2018 |
| O    | 3      | 0.1567 | 0.4830 | 0.3562 |
| O    | 4      | 0.1519 | 0.4780 | 0.0998 |
| O    | 5      | 0.2278 | 0.0539 | 0.2428 |
| O    | 6      | 0.0555 | 0.1316 | 0.3841 |
| O    | 7      | 0.0794 | 0.1555 | 0.0298 |
| O    | 8      | 0.1547 | 0.2313 | 0.1837 |
| O    | 9      | 0.2275 | 0.3035 | 0.3290 |
| O    | 10     | 0.1809 | 0.0068 | 0.0014 |
| O    | 11     | 0.0085 | 0.0844 | 0.1427 |
| O    | 12     | 0.0850 | 0.1611 | 0.2860 |
| O    | 13     | 0.2586 | 0.3347 | 0.0577 |
| O    | 14     | 0.3326 | 0.4094 | 0.2036 |
| O    | 15     | 0.4076 | 0.4822 | 0.3537 |
| O    | 16     | 0.4013 | 0.4782 | 0.0999 |
| O    | 17     | 0.4788 | 0.0558 | 0.2421 |

---

|   |    |        |        |        |
|---|----|--------|--------|--------|
| O | 18 | 0.3062 | 0.1334 | 0.3844 |
| O | 19 | 0.3290 | 0.1551 | 0.0299 |
| O | 20 | 0.4043 | 0.2308 | 0.1835 |
| O | 21 | 0.4787 | 0.3060 | 0.3276 |
| O | 22 | 0.4303 | 0.0064 | 0.0014 |
| O | 23 | 0.2586 | 0.0850 | 0.1435 |
| O | 24 | 0.3344 | 0.1605 | 0.2861 |
| O | 25 | 0.5085 | 0.3345 | 0.0567 |
| O | 26 | 0.5825 | 0.4084 | 0.2016 |
| O | 27 | 0.6574 | 0.4840 | 0.3561 |
| O | 28 | 0.6516 | 0.4776 | 0.0990 |
| O | 29 | 0.7284 | 0.0545 | 0.2422 |
| O | 30 | 0.5556 | 0.1341 | 0.3836 |
| O | 31 | 0.5790 | 0.1550 | 0.0296 |
| O | 32 | 0.6548 | 0.2309 | 0.1829 |
| O | 33 | 0.7280 | 0.3045 | 0.3282 |
| O | 34 | 0.6804 | 0.0062 | 0.0008 |
| O | 35 | 0.5085 | 0.0843 | 0.1428 |
| O | 36 | 0.5857 | 0.1611 | 0.2856 |
| O | 37 | 0.7584 | 0.3342 | 0.0562 |
| O | 38 | 0.8323 | 0.4082 | 0.2019 |
| O | 39 | 0.9074 | 0.4837 | 0.3562 |
| O | 40 | 0.9015 | 0.4773 | 0.0989 |
| O | 41 | 0.9781 | 0.0544 | 0.2421 |
| O | 42 | 0.8058 | 0.1320 | 0.3842 |
| O | 43 | 0.8292 | 0.1549 | 0.0294 |
| O | 44 | 0.9045 | 0.2305 | 0.1829 |
| O | 45 | 0.9777 | 0.3040 | 0.3281 |
| O | 46 | 0.9306 | 0.0063 | 0.0007 |
| O | 47 | 0.7586 | 0.0845 | 0.1428 |
| O | 48 | 0.8353 | 0.1614 | 0.2860 |
| O | 49 | 0.0086 | 0.8345 | 0.0562 |
| O | 50 | 0.0822 | 0.9084 | 0.2018 |
| O | 51 | 0.1571 | 0.9836 | 0.3563 |
| O | 52 | 0.1515 | 0.9776 | 0.0995 |
| O | 53 | 0.2282 | 0.5546 | 0.2435 |
| O | 54 | 0.0555 | 0.6323 | 0.3842 |
| O | 55 | 0.0795 | 0.6551 | 0.0298 |
| O | 56 | 0.1547 | 0.7306 | 0.1837 |
| O | 57 | 0.2277 | 0.8044 | 0.3294 |
| O | 58 | 0.1811 | 0.5068 | 0.0018 |
| O | 59 | 0.0085 | 0.5846 | 0.1427 |
| O | 60 | 0.0850 | 0.6616 | 0.2860 |
| O | 61 | 0.2586 | 0.8346 | 0.0576 |

---

---

|    |    |         |        |        |
|----|----|---------|--------|--------|
| O  | 62 | 0.3325  | 0.9086 | 0.2033 |
| O  | 63 | 0.4075  | 0.9876 | 0.3544 |
| O  | 64 | 0.4013  | 0.9770 | 0.0998 |
| O  | 65 | 0.4789  | 0.5556 | 0.2423 |
| O  | 66 | 0.3029  | 0.6277 | 0.3869 |
| O  | 67 | 0.3291  | 0.6551 | 0.0300 |
| O  | 68 | 0.4048  | 0.7311 | 0.1844 |
| O  | 69 | 0.4774  | 0.8046 | 0.3288 |
| O  | 70 | 0.4303  | 0.5060 | 0.0015 |
| O  | 71 | 0.2591  | 0.5851 | 0.1446 |
| O  | 72 | 0.3354  | 0.6632 | 0.2899 |
| O  | 73 | 0.5085  | 0.8344 | 0.0567 |
| O  | 74 | 0.5825  | 0.9085 | 0.2016 |
| O  | 75 | 0.6574  | 0.9838 | 0.3559 |
| O  | 76 | 0.6516  | 0.9777 | 0.0990 |
| O  | 77 | 0.7284  | 0.5546 | 0.2422 |
| O  | 78 | 0.5552  | 0.6341 | 0.3841 |
| O  | 79 | 0.5790  | 0.6550 | 0.0296 |
| O  | 80 | 0.6548  | 0.7308 | 0.1828 |
| O  | 81 | 0.7275  | 0.8039 | 0.3281 |
| O  | 82 | 0.6804  | 0.5061 | 0.0008 |
| O  | 83 | 0.5085  | 0.5844 | 0.1429 |
| O  | 84 | 0.5859  | 0.6613 | 0.2857 |
| O  | 85 | 0.7584  | 0.8342 | 0.0562 |
| O  | 86 | 0.8323  | 0.9082 | 0.2019 |
| O  | 87 | 0.9074  | 0.9837 | 0.3562 |
| O  | 88 | 0.9015  | 0.9773 | 0.0989 |
| O  | 89 | 0.9782  | 0.5542 | 0.2421 |
| O  | 90 | 0.8057  | 0.6324 | 0.3842 |
| O  | 91 | 0.8291  | 0.6548 | 0.0294 |
| O  | 92 | 0.9045  | 0.7305 | 0.1829 |
| O  | 93 | 0.9776  | 0.8039 | 0.3280 |
| O  | 94 | 0.9306  | 0.5064 | 0.0007 |
| O  | 95 | 0.7586  | 0.5844 | 0.1428 |
| O  | 96 | 0.8353  | 0.6615 | 0.2860 |
| O  | 97 | 0.4247  | 0.5344 | 0.5253 |
| O  | 98 | 0.4069  | 0.7319 | 0.4443 |
| O  | 99 | 0.5309  | 0.8007 | 0.4764 |
| Ti | 1  | 0.1051  | 0.4309 | 0.0388 |
| Ti | 2  | 0.1748  | 0.0011 | 0.1813 |
| Ti | 3  | 0.2473  | 0.0735 | 0.3281 |
| Ti | 4  | -0.0111 | 0.0648 | 0.0574 |
| Ti | 5  | 0.0620  | 0.1387 | 0.2043 |
| Ti | 6  | 0.1318  | 0.2086 | 0.3469 |

---



---

|    |    |         |        |        |
|----|----|---------|--------|--------|
| Ti | 7  | 0.3545  | 0.4307 | 0.0390 |
| Ti | 8  | 0.4247  | 0.0009 | 0.1811 |
| Ti | 9  | 0.4975  | 0.0751 | 0.3267 |
| Ti | 10 | 0.2390  | 0.0649 | 0.0582 |
| Ti | 11 | 0.3118  | 0.1379 | 0.2050 |
| Ti | 12 | 0.3817  | 0.2086 | 0.3466 |
| Ti | 13 | 0.6047  | 0.4305 | 0.0383 |
| Ti | 14 | 0.6753  | 0.0016 | 0.1807 |
| Ti | 15 | 0.7475  | 0.0742 | 0.3276 |
| Ti | 16 | 0.4890  | 0.0648 | 0.0579 |
| Ti | 17 | 0.5622  | 0.1382 | 0.2040 |
| Ti | 18 | 0.6317  | 0.2079 | 0.3469 |
| Ti | 19 | 0.8547  | 0.4304 | 0.0381 |
| Ti | 20 | 0.9251  | 0.0011 | 0.1806 |
| Ti | 21 | 0.9975  | 0.0737 | 0.3276 |
| Ti | 22 | 0.7389  | 0.0646 | 0.0574 |
| Ti | 23 | 0.8122  | 0.1380 | 0.2043 |
| Ti | 24 | 0.8819  | 0.2081 | 0.3470 |
| Ti | 25 | 0.1048  | 0.9307 | 0.0386 |
| Ti | 26 | 0.1759  | 0.5022 | 0.1814 |
| Ti | 27 | 0.2481  | 0.5741 | 0.3288 |
| Ti | 28 | -0.0111 | 0.5646 | 0.0574 |
| Ti | 29 | 0.0620  | 0.6375 | 0.2044 |
| Ti | 30 | 0.1318  | 0.7078 | 0.3470 |
| Ti | 31 | 0.3546  | 0.9305 | 0.0389 |
| Ti | 32 | 0.4245  | 0.5015 | 0.1810 |
| Ti | 33 | 0.4963  | 0.5731 | 0.3257 |
| Ti | 34 | 0.2391  | 0.5650 | 0.0588 |
| Ti | 35 | 0.3122  | 0.6386 | 0.2077 |
| Ti | 36 | 0.3831  | 0.7119 | 0.3530 |
| Ti | 37 | 0.6047  | 0.9307 | 0.0383 |
| Ti | 38 | 0.6753  | 0.5013 | 0.1807 |
| Ti | 39 | 0.7475  | 0.5737 | 0.3276 |
| Ti | 40 | 0.4891  | 0.5649 | 0.0579 |
| Ti | 41 | 0.5625  | 0.6384 | 0.2039 |
| Ti | 42 | 0.6319  | 0.7081 | 0.3466 |
| Ti | 43 | 0.8547  | 0.9304 | 0.0381 |
| Ti | 44 | 0.9251  | 0.5012 | 0.1807 |
| Ti | 45 | 0.9975  | 0.5738 | 0.3276 |
| Ti | 46 | 0.7389  | 0.5645 | 0.0574 |
| Ti | 47 | 0.8122  | 0.6380 | 0.2043 |
| Ti | 48 | 0.8819  | 0.7082 | 0.3470 |
| As | 1  | 0.4580  | 0.7791 | 0.5062 |

---

H<sub>3</sub>AsO<sub>3</sub>-{101} BB:

| Atom | Number | v      | w      | x       |
|------|--------|--------|--------|---------|
| H    | 1      | 0.4691 | 0.8080 | 0.4392  |
| H    | 2      | 0.5316 | 0.5851 | 0.4450  |
| H    | 3      | 0.3580 | 0.2471 | 0.4508  |
| O    | 1      | 0.0108 | 0.3359 | 0.0563  |
| O    | 2      | 0.0837 | 0.4084 | 0.2020  |
| O    | 3      | 0.1578 | 0.4812 | 0.3566  |
| O    | 4      | 0.1536 | 0.4783 | 0.1003  |
| O    | 5      | 0.2295 | 0.0534 | 0.2439  |
| O    | 6      | 0.0566 | 0.1307 | 0.3842  |
| O    | 7      | 0.0817 | 0.1569 | 0.0300  |
| O    | 8      | 0.1565 | 0.2312 | 0.1844  |
| O    | 9      | 0.2288 | 0.3026 | 0.3294  |
| O    | 10     | 0.1833 | 0.0084 | 0.0023  |
| O    | 11     | 0.0104 | 0.0852 | 0.1427  |
| O    | 12     | 0.0862 | 0.1607 | 0.2861  |
| O    | 13     | 0.2606 | 0.3361 | 0.0587  |
| O    | 14     | 0.3348 | 0.4102 | 0.2053  |
| O    | 15     | 0.4071 | 0.4833 | 0.3439  |
| O    | 16     | 0.4028 | 0.4784 | 0.0996  |
| O    | 17     | 0.4804 | 0.0570 | 0.2415  |
| O    | 18     | 0.3052 | 0.1299 | 0.3863  |
| O    | 19     | 0.3306 | 0.1560 | 0.0298  |
| O    | 20     | 0.4059 | 0.2317 | 0.1836  |
| O    | 21     | 0.4794 | 0.3047 | 0.3280  |
| O    | 22     | 0.4318 | 0.0074 | 0.0010  |
| O    | 23     | 0.2607 | 0.0873 | 0.1450  |
| O    | 24     | 0.3361 | 0.1526 | 0.2888  |
| O    | 25     | 0.5105 | 0.3358 | 0.0557  |
| O    | 26     | 0.5844 | 0.4096 | 0.2001  |
| O    | 27     | 0.6585 | 0.4834 | 0.3549  |
| O    | 28     | 0.6537 | 0.4788 | 0.0979  |
| O    | 29     | 0.7299 | 0.0551 | 0.2413  |
| O    | 30     | 0.5570 | 0.1284 | 0.3833  |
| O    | 31     | 0.5810 | 0.1566 | 0.0287  |
| O    | 32     | 0.6567 | 0.2322 | 0.1820  |
| O    | 33     | 0.7291 | 0.3039 | 0.3275  |
| O    | 34     | 0.6825 | 0.0079 | -0.0003 |
| O    | 35     | 0.5100 | 0.0853 | 0.1422  |
| O    | 36     | 0.5871 | 0.1639 | 0.2848  |
| O    | 37     | 0.7605 | 0.3360 | 0.0552  |
| O    | 38     | 0.8340 | 0.4091 | 0.2013  |

---

|   |    |        |        |         |
|---|----|--------|--------|---------|
| O | 39 | 0.9084 | 0.4830 | 0.3556  |
| O | 40 | 0.9036 | 0.4789 | 0.0986  |
| O | 41 | 0.9796 | 0.0546 | 0.2420  |
| O | 42 | 0.8068 | 0.1312 | 0.3834  |
| O | 43 | 0.8314 | 0.1568 | 0.0289  |
| O | 44 | 0.9064 | 0.2315 | 0.1825  |
| O | 45 | 0.9789 | 0.3035 | 0.3280  |
| O | 46 | 0.9330 | 0.0083 | 0.0004  |
| O | 47 | 0.7606 | 0.0862 | 0.1419  |
| O | 48 | 0.8366 | 0.1613 | 0.2853  |
| O | 49 | 0.0107 | 0.8359 | 0.0562  |
| O | 50 | 0.0838 | 0.9085 | 0.2021  |
| O | 51 | 0.1580 | 0.9820 | 0.3565  |
| O | 52 | 0.1536 | 0.9786 | 0.1002  |
| O | 53 | 0.2293 | 0.5535 | 0.2442  |
| O | 54 | 0.0564 | 0.6308 | 0.3844  |
| O | 55 | 0.0817 | 0.6568 | 0.0301  |
| O | 56 | 0.1566 | 0.7312 | 0.1843  |
| O | 57 | 0.2286 | 0.8019 | 0.3309  |
| O | 58 | 0.1834 | 0.5092 | 0.0023  |
| O | 59 | 0.0104 | 0.5854 | 0.1428  |
| O | 60 | 0.0864 | 0.6604 | 0.2863  |
| O | 61 | 0.2608 | 0.8362 | 0.0591  |
| O | 62 | 0.3343 | 0.9096 | 0.2031  |
| O | 63 | 0.4100 | 0.9855 | 0.3571  |
| O | 64 | 0.4032 | 0.9785 | 0.0994  |
| O | 65 | 0.4814 | 0.5557 | 0.2404  |
| O | 66 | 0.3057 | 0.6232 | 0.3869  |
| O | 67 | 0.3306 | 0.6560 | 0.0299  |
| O | 68 | 0.4061 | 0.7312 | 0.1841  |
| O | 69 | 0.4803 | 0.8064 | 0.3266  |
| O | 70 | 0.4318 | 0.5072 | 0.0011  |
| O | 71 | 0.2607 | 0.5850 | 0.1453  |
| O | 72 | 0.3357 | 0.6711 | 0.2894  |
| O | 73 | 0.5105 | 0.8362 | 0.0556  |
| O | 74 | 0.5843 | 0.9102 | 0.2004  |
| O | 75 | 0.6585 | 0.9830 | 0.3545  |
| O | 76 | 0.6537 | 0.9798 | 0.0979  |
| O | 77 | 0.7299 | 0.5552 | 0.2413  |
| O | 78 | 0.5563 | 0.6310 | 0.3821  |
| O | 79 | 0.5809 | 0.6564 | 0.0287  |
| O | 80 | 0.6568 | 0.7323 | 0.1814  |
| O | 81 | 0.7289 | 0.8035 | 0.3273  |
| O | 82 | 0.6825 | 0.5081 | -0.0003 |

---

---

|    |    |         |        |        |
|----|----|---------|--------|--------|
| O  | 83 | 0.5102  | 0.5860 | 0.1413 |
| O  | 84 | 0.5876  | 0.6625 | 0.2837 |
| O  | 85 | 0.7605  | 0.8360 | 0.0553 |
| O  | 86 | 0.8340  | 0.9091 | 0.2012 |
| O  | 87 | 0.9084  | 0.9830 | 0.3556 |
| O  | 88 | 0.9036  | 0.9789 | 0.0986 |
| O  | 89 | 0.9797  | 0.5546 | 0.2421 |
| O  | 90 | 0.8068  | 0.6318 | 0.3834 |
| O  | 91 | 0.8314  | 0.6568 | 0.0289 |
| O  | 92 | 0.9064  | 0.7315 | 0.1826 |
| O  | 93 | 0.9789  | 0.8034 | 0.3279 |
| O  | 94 | 0.9330  | 0.5082 | 0.0005 |
| O  | 95 | 0.7606  | 0.5856 | 0.1419 |
| O  | 96 | 0.8366  | 0.6613 | 0.2853 |
| O  | 97 | 0.4278  | 0.7057 | 0.4379 |
| O  | 98 | 0.5138  | 0.5676 | 0.4837 |
| O  | 99 | 0.4038  | 0.3129 | 0.4442 |
| Ti | 1  | 0.1072  | 0.4322 | 0.0391 |
| Ti | 2  | 0.1770  | 0.0018 | 0.1819 |
| Ti | 3  | 0.2486  | 0.0714 | 0.3289 |
| Ti | 4  | -0.0089 | 0.0664 | 0.0573 |
| Ti | 5  | 0.0638  | 0.1387 | 0.2045 |
| Ti | 6  | 0.1329  | 0.2072 | 0.3471 |
| Ti | 7  | 0.3561  | 0.4316 | 0.0386 |
| Ti | 8  | 0.4262  | 0.0018 | 0.1806 |
| Ti | 9  | 0.4986  | 0.0735 | 0.3261 |
| Ti | 10 | 0.2411  | 0.0665 | 0.0593 |
| Ti | 11 | 0.3137  | 0.1383 | 0.2074 |
| Ti | 12 | 0.3843  | 0.2109 | 0.3504 |
| Ti | 13 | 0.6067  | 0.4319 | 0.0371 |
| Ti | 14 | 0.6773  | 0.0035 | 0.1796 |
| Ti | 15 | 0.7488  | 0.0735 | 0.3266 |
| Ti | 16 | 0.4908  | 0.0664 | 0.0571 |
| Ti | 17 | 0.5640  | 0.1395 | 0.2032 |
| Ti | 18 | 0.6331  | 0.2080 | 0.3459 |
| Ti | 19 | 0.8570  | 0.4324 | 0.0376 |
| Ti | 20 | 0.9270  | 0.0021 | 0.1804 |
| Ti | 21 | 0.9988  | 0.0733 | 0.3275 |
| Ti | 22 | 0.7410  | 0.0665 | 0.0564 |
| Ti | 23 | 0.8140  | 0.1391 | 0.2036 |
| Ti | 24 | 0.8830  | 0.2077 | 0.3464 |
| Ti | 25 | 0.1071  | 0.9321 | 0.0391 |
| Ti | 26 | 0.1774  | 0.5020 | 0.1820 |
| Ti | 27 | 0.2493  | 0.5726 | 0.3290 |

---

|    |    |         |        |        |
|----|----|---------|--------|--------|
| Ti | 28 | -0.0089 | 0.5663 | 0.0574 |
| Ti | 29 | 0.0638  | 0.6382 | 0.2046 |
| Ti | 30 | 0.1328  | 0.7062 | 0.3475 |
| Ti | 31 | 0.3562  | 0.9315 | 0.0387 |
| Ti | 32 | 0.4253  | 0.5009 | 0.1798 |
| Ti | 33 | 0.4971  | 0.5735 | 0.3216 |
| Ti | 34 | 0.2411  | 0.5665 | 0.0595 |
| Ti | 35 | 0.3139  | 0.6400 | 0.2083 |
| Ti | 36 | 0.3835  | 0.7092 | 0.3525 |
| Ti | 37 | 0.6067  | 0.9326 | 0.0371 |
| Ti | 38 | 0.6773  | 0.5023 | 0.1796 |
| Ti | 39 | 0.7488  | 0.5735 | 0.3268 |
| Ti | 40 | 0.4912  | 0.5668 | 0.0571 |
| Ti | 41 | 0.5648  | 0.6401 | 0.2017 |
| Ti | 42 | 0.6329  | 0.7076 | 0.3450 |
| Ti | 43 | 0.8570  | 0.9324 | 0.0376 |
| Ti | 44 | 0.9270  | 0.5022 | 0.1804 |
| Ti | 45 | 0.9987  | 0.5732 | 0.3275 |
| Ti | 46 | 0.7410  | 0.5665 | 0.0563 |
| Ti | 47 | 0.8140  | 0.6390 | 0.2036 |
| Ti | 48 | 0.8831  | 0.7078 | 0.3464 |
| As | 1  | 0.4325  | 0.5221 | 0.4880 |

$\text{H}_2\text{AsO}_4\text{-}\{001\}$  MM:

| Atom | Number | v       | w       | x       |
|------|--------|---------|---------|---------|
| H    | 1      | -0.7908 | 0.3063  | 0.5063  |
| H    | 2      | -0.5793 | 0.5724  | 0.5569  |
| O    | 1      | 0.1520  | -0.0018 | -0.0006 |
| O    | 2      | 0.1316  | 0.0114  | 0.3841  |
| O    | 3      | 0.0290  | 0.2766  | 0.1917  |
| O    | 4      | 0.1519  | 0.2893  | 0.0973  |
| O    | 5      | 0.0267  | 0.0215  | 0.2878  |
| O    | 6      | 0.0269  | 0.0275  | 0.1307  |
| O    | 7      | 0.1486  | 0.2757  | 0.3250  |
| O    | 8      | 0.0275  | 0.2503  | 0.0360  |
| O    | 9      | -0.0122 | 0.2763  | 0.4211  |
| O    | 10     | 0.1517  | 0.0288  | 0.2279  |
| O    | 11     | 0.4002  | -0.0012 | -0.0010 |
| O    | 12     | 0.4078  | 0.0291  | 0.3801  |
| O    | 13     | 0.2753  | 0.2762  | 0.1916  |
| O    | 14     | 0.4012  | 0.2887  | 0.0965  |
| O    | 15     | 0.2780  | 0.0407  | 0.2884  |

---

|   |    |         |         |         |
|---|----|---------|---------|---------|
| O | 16 | 0.2764  | 0.0271  | 0.1312  |
| O | 17 | 0.4130  | 0.2749  | 0.3193  |
| O | 18 | 0.2763  | 0.2495  | 0.0361  |
| O | 19 | 0.1628  | 0.2781  | 0.4605  |
| O | 20 | 0.4002  | 0.0246  | 0.2243  |
| O | 21 | 0.6515  | -0.0001 | -0.0016 |
| O | 22 | 0.6433  | 0.0265  | 0.3750  |
| O | 23 | 0.5238  | 0.2758  | 0.1895  |
| O | 24 | 0.6517  | 0.2879  | 0.0954  |
| O | 25 | 0.5275  | 0.0257  | 0.2831  |
| O | 26 | 0.5267  | 0.0268  | 0.1279  |
| O | 27 | 0.6594  | 0.2755  | 0.3150  |
| O | 28 | 0.5261  | 0.2518  | 0.0343  |
| O | 29 | 0.5411  | 0.2760  | 0.4209  |
| O | 30 | 0.6513  | 0.0269  | 0.2204  |
| O | 31 | 0.9034  | -0.0004 | -0.0011 |
| O | 32 | 0.8719  | 0.0270  | 0.3765  |
| O | 33 | 0.7782  | 0.2762  | 0.1893  |
| O | 34 | 0.9023  | 0.2887  | 0.0963  |
| O | 35 | 0.7758  | 0.0194  | 0.2822  |
| O | 36 | 0.7769  | 0.0273  | 0.1274  |
| O | 37 | 0.9013  | 0.2762  | 0.3175  |
| O | 38 | 0.7773  | 0.2524  | 0.0340  |
| O | 39 | 0.7624  | 0.2759  | 0.4205  |
| O | 40 | 0.9030  | 0.0271  | 0.2232  |
| O | 41 | 0.1521  | 0.4985  | -0.0006 |
| O | 42 | 0.1316  | 0.5408  | 0.3838  |
| O | 43 | 0.0295  | 0.7766  | 0.1916  |
| O | 44 | 0.1518  | 0.7893  | 0.0974  |
| O | 45 | 0.0267  | 0.5303  | 0.2878  |
| O | 46 | 0.0268  | 0.5277  | 0.1307  |
| O | 47 | 0.1722  | 0.7762  | 0.3189  |
| O | 48 | 0.0275  | 0.7501  | 0.0360  |
| O | 49 | -0.0584 | 0.7769  | 0.4448  |
| O | 50 | 0.1517  | 0.5249  | 0.2278  |
| O | 51 | 0.4002  | 0.4992  | -0.0010 |
| O | 52 | 0.4073  | 0.5199  | 0.3803  |
| O | 53 | 0.2741  | 0.7762  | 0.1926  |
| O | 54 | 0.4013  | 0.7888  | 0.0967  |
| O | 55 | 0.2778  | 0.5099  | 0.2884  |
| O | 56 | 0.2765  | 0.5274  | 0.1312  |
| O | 57 | 0.4058  | 0.7744  | 0.3193  |
| O | 58 | 0.2763  | 0.7496  | 0.0365  |
| O | 59 | 0.2850  | 0.7762  | 0.4129  |

---

---

|    |    |         |        |         |
|----|----|---------|--------|---------|
| O  | 60 | 0.4001  | 0.5276 | 0.2244  |
| O  | 61 | 0.6515  | 0.4997 | -0.0016 |
| O  | 62 | 0.6434  | 0.5247 | 0.3750  |
| O  | 63 | 0.5247  | 0.7757 | 0.1895  |
| O  | 64 | 0.6518  | 0.7880 | 0.0953  |
| O  | 65 | 0.5275  | 0.5243 | 0.2832  |
| O  | 66 | 0.5267  | 0.5268 | 0.1279  |
| O  | 67 | 0.6517  | 0.7755 | 0.3158  |
| O  | 68 | 0.5261  | 0.7519 | 0.0343  |
| O  | 69 | 0.5226  | 0.7754 | 0.4186  |
| O  | 70 | 0.6513  | 0.5256 | 0.2204  |
| O  | 71 | 0.9033  | 0.4992 | -0.0011 |
| O  | 72 | 0.8717  | 0.5256 | 0.3765  |
| O  | 73 | 0.7781  | 0.7761 | 0.1889  |
| O  | 74 | 0.9022  | 0.7890 | 0.0962  |
| O  | 75 | 0.7758  | 0.5318 | 0.2822  |
| O  | 76 | 0.7769  | 0.5271 | 0.1274  |
| O  | 77 | 0.9028  | 0.7762 | 0.3182  |
| O  | 78 | 0.7773  | 0.7525 | 0.0338  |
| O  | 79 | 0.7435  | 0.7761 | 0.4250  |
| O  | 80 | 0.9030  | 0.5267 | 0.2232  |
| O  | 81 | -0.5844 | 0.1971 | 0.5645  |
| O  | 82 | -0.7515 | 0.3309 | 0.5403  |
| O  | 83 | -0.6025 | 0.5392 | 0.5225  |
| O  | 84 | -0.6373 | 0.2703 | 0.4595  |
| Ti | 1  | 0.1493  | 0.0342 | 0.3055  |
| Ti | 2  | 0.0270  | 0.2718 | 0.1138  |
| Ti | 3  | 0.1520  | 0.2806 | 0.0218  |
| Ti | 4  | 0.1069  | 0.2754 | 0.4047  |
| Ti | 5  | 0.0266  | 0.0263 | 0.2090  |
| Ti | 6  | 0.4014  | 0.0323 | 0.3031  |
| Ti | 7  | 0.2767  | 0.2712 | 0.1140  |
| Ti | 8  | 0.4006  | 0.2809 | 0.0212  |
| Ti | 9  | 0.4307  | 0.2738 | 0.4001  |
| Ti | 10 | 0.2761  | 0.0267 | 0.2097  |
| Ti | 11 | 0.6510  | 0.0240 | 0.2994  |
| Ti | 12 | 0.5265  | 0.2708 | 0.1119  |
| Ti | 13 | 0.6516  | 0.2807 | 0.0204  |
| Ti | 14 | 0.6557  | 0.2756 | 0.3907  |
| Ti | 15 | 0.5260  | 0.0255 | 0.2065  |
| Ti | 16 | 0.8991  | 0.0197 | 0.3032  |
| Ti | 17 | 0.7769  | 0.2712 | 0.1116  |
| Ti | 18 | 0.9029  | 0.2807 | 0.0211  |
| Ti | 19 | 0.8794  | 0.2765 | 0.3920  |

---

|    |    |         |        |        |
|----|----|---------|--------|--------|
| Ti | 20 | 0.7776  | 0.0260 | 0.2061 |
| Ti | 21 | 0.1491  | 0.5173 | 0.3058 |
| Ti | 22 | 0.0271  | 0.7717 | 0.1137 |
| Ti | 23 | 0.1520  | 0.7804 | 0.0218 |
| Ti | 24 | 0.1746  | 0.7763 | 0.3909 |
| Ti | 25 | 0.0268  | 0.5269 | 0.2091 |
| Ti | 26 | 0.4012  | 0.5174 | 0.3029 |
| Ti | 27 | 0.2766  | 0.7713 | 0.1143 |
| Ti | 28 | 0.4006  | 0.7808 | 0.0213 |
| Ti | 29 | 0.4102  | 0.7735 | 0.3929 |
| Ti | 30 | 0.2759  | 0.5255 | 0.2097 |
| Ti | 31 | 0.6510  | 0.5269 | 0.2994 |
| Ti | 32 | 0.5266  | 0.7707 | 0.1119 |
| Ti | 33 | 0.6516  | 0.7809 | 0.0203 |
| Ti | 34 | 0.6396  | 0.7756 | 0.3926 |
| Ti | 35 | 0.5261  | 0.5258 | 0.2066 |
| Ti | 36 | 0.8990  | 0.5328 | 0.3032 |
| Ti | 37 | 0.7769  | 0.7711 | 0.1116 |
| Ti | 38 | 0.9029  | 0.7809 | 0.0210 |
| Ti | 39 | 0.8633  | 0.7764 | 0.3995 |
| Ti | 40 | 0.7778  | 0.5262 | 0.2061 |
| As | 1  | -0.6425 | 0.3214 | 0.5249 |

H<sub>2</sub>AsO<sub>4</sub>-{001} BB:

| Atom | Number | v       | w       | x       |
|------|--------|---------|---------|---------|
| H    | 1      | -0.7976 | 0.6830  | 0.4808  |
| H    | 2      | -0.5282 | 0.4542  | 0.5426  |
| O    | 1      | 0.1538  | -0.0013 | -0.0013 |
| O    | 2      | 0.1115  | 0.0243  | 0.3793  |
| O    | 3      | 0.0315  | 0.2757  | 0.1894  |
| O    | 4      | 0.1526  | 0.2886  | 0.0964  |
| O    | 5      | 0.0252  | 0.0244  | 0.2834  |
| O    | 6      | 0.0272  | 0.0268  | 0.1279  |
| O    | 7      | 0.1521  | 0.2764  | 0.3219  |
| O    | 8      | 0.0282  | 0.2511  | 0.0339  |
| O    | 9      | -0.0152 | 0.2755  | 0.4255  |
| O    | 10     | 0.1535  | 0.0254  | 0.2265  |
| O    | 11     | 0.4002  | -0.0019 | -0.0015 |
| O    | 12     | 0.4160  | 0.0287  | 0.3873  |
| O    | 13     | 0.2774  | 0.2764  | 0.1924  |
| O    | 14     | 0.4014  | 0.2891  | 0.0965  |
| O    | 15     | 0.2771  | 0.0265  | 0.2905  |



---

|   |    |         |         |         |
|---|----|---------|---------|---------|
| O | 16 | 0.2769  | 0.0274  | 0.1319  |
| O | 17 | 0.4066  | 0.2759  | 0.3245  |
| O | 18 | 0.2770  | 0.2483  | 0.0362  |
| O | 19 | 0.1815  | 0.2743  | 0.4462  |
| O | 20 | 0.4004  | 0.0276  | 0.2280  |
| O | 21 | 0.6504  | -0.0006 | -0.0027 |
| O | 22 | 0.6613  | 0.0264  | 0.3735  |
| O | 23 | 0.5229  | 0.2757  | 0.1897  |
| O | 24 | 0.6514  | 0.2877  | 0.0944  |
| O | 25 | 0.5282  | 0.0270  | 0.2852  |
| O | 26 | 0.5263  | 0.0270  | 0.1285  |
| O | 27 | 0.6579  | 0.2764  | 0.3136  |
| O | 28 | 0.5257  | 0.2501  | 0.0343  |
| O | 29 | 0.5515  | 0.2730  | 0.4204  |
| O | 30 | 0.6500  | 0.0256  | 0.2197  |
| O | 31 | 0.9035  | -0.0003 | -0.0025 |
| O | 32 | 0.8810  | 0.0256  | 0.3733  |
| O | 33 | 0.7766  | 0.2751  | 0.1869  |
| O | 34 | 0.9024  | 0.2875  | 0.0944  |
| O | 35 | 0.7774  | 0.0274  | 0.2793  |
| O | 36 | 0.7770  | 0.0263  | 0.1251  |
| O | 37 | 0.9033  | 0.2757  | 0.3148  |
| O | 38 | 0.7769  | 0.2528  | 0.0322  |
| O | 39 | 0.7699  | 0.2766  | 0.4215  |
| O | 40 | 0.9032  | 0.0261  | 0.2190  |
| O | 41 | 0.1537  | 0.4985  | -0.0013 |
| O | 42 | 0.1105  | 0.5278  | 0.3790  |
| O | 43 | 0.0312  | 0.7756  | 0.1892  |
| O | 44 | 0.1526  | 0.7887  | 0.0964  |
| O | 45 | 0.0254  | 0.5271  | 0.2834  |
| O | 46 | 0.0272  | 0.5268  | 0.1279  |
| O | 47 | 0.1525  | 0.7760  | 0.3230  |
| O | 48 | 0.0282  | 0.7512  | 0.0338  |
| O | 49 | -0.0123 | 0.7755  | 0.4231  |
| O | 50 | 0.1538  | 0.5265  | 0.2267  |
| O | 51 | 0.4004  | 0.4981  | -0.0015 |
| O | 52 | 0.4327  | 0.5283  | 0.3795  |
| O | 53 | 0.2777  | 0.7765  | 0.1924  |
| O | 54 | 0.4014  | 0.7890  | 0.0964  |
| O | 55 | 0.2786  | 0.5273  | 0.2905  |
| O | 56 | 0.2768  | 0.5274  | 0.1317  |
| O | 57 | 0.4071  | 0.7801  | 0.3241  |
| O | 58 | 0.2770  | 0.7482  | 0.0361  |
| O | 59 | 0.1743  | 0.7655  | 0.4529  |

---

---

|    |    |         |        |         |
|----|----|---------|--------|---------|
| O  | 60 | 0.4012  | 0.5262 | 0.2266  |
| O  | 61 | 0.6503  | 0.4994 | -0.0026 |
| O  | 62 | 0.6591  | 0.5261 | 0.3738  |
| O  | 63 | 0.5225  | 0.7763 | 0.1897  |
| O  | 64 | 0.6514  | 0.7883 | 0.0944  |
| O  | 65 | 0.5292  | 0.5268 | 0.2837  |
| O  | 66 | 0.5269  | 0.5270 | 0.1281  |
| O  | 67 | 0.6587  | 0.7759 | 0.3133  |
| O  | 68 | 0.5257  | 0.7508 | 0.0342  |
| O  | 69 | 0.5536  | 0.7829 | 0.4199  |
| O  | 70 | 0.6510  | 0.5258 | 0.2192  |
| O  | 71 | 0.9035  | 0.4996 | -0.0025 |
| O  | 72 | 0.8812  | 0.5259 | 0.3733  |
| O  | 73 | 0.7770  | 0.7755 | 0.1870  |
| O  | 74 | 0.9024  | 0.7874 | 0.0943  |
| O  | 75 | 0.7775  | 0.5242 | 0.2793  |
| O  | 76 | 0.7770  | 0.5264 | 0.1251  |
| O  | 77 | 0.9007  | 0.7757 | 0.3143  |
| O  | 78 | 0.7769  | 0.7528 | 0.0322  |
| O  | 79 | 0.7714  | 0.7756 | 0.4209  |
| O  | 80 | 0.9034  | 0.5252 | 0.2192  |
| O  | 81 | -0.6213 | 0.3472 | 0.4626  |
| O  | 82 | -0.7516 | 0.5569 | 0.5164  |
| O  | 83 | -0.5796 | 0.5272 | 0.5509  |
| O  | 84 | -0.6187 | 0.7178 | 0.4613  |
| Ti | 1  | 0.1494  | 0.0246 | 0.3066  |
| Ti | 2  | 0.0273  | 0.2707 | 0.1119  |
| Ti | 3  | 0.1533  | 0.2801 | 0.0210  |
| Ti | 4  | 0.1040  | 0.2763 | 0.3994  |
| Ti | 5  | 0.0297  | 0.0255 | 0.2068  |
| Ti | 6  | 0.4000  | 0.0281 | 0.3063  |
| Ti | 7  | 0.2770  | 0.2715 | 0.1144  |
| Ti | 8  | 0.4008  | 0.2803 | 0.0209  |
| Ti | 9  | 0.4386  | 0.2806 | 0.4015  |
| Ti | 10 | 0.2762  | 0.0264 | 0.2104  |
| Ti | 11 | 0.6518  | 0.0266 | 0.2972  |
| Ti | 12 | 0.5266  | 0.2705 | 0.1118  |
| Ti | 13 | 0.6507  | 0.2807 | 0.0194  |
| Ti | 14 | 0.6639  | 0.2757 | 0.3897  |
| Ti | 15 | 0.5245  | 0.0258 | 0.2072  |
| Ti | 16 | 0.9004  | 0.0267 | 0.2984  |
| Ti | 17 | 0.7768  | 0.2703 | 0.1094  |
| Ti | 18 | 0.9031  | 0.2805 | 0.0195  |
| Ti | 19 | 0.8838  | 0.2758 | 0.3916  |

---

|    |    |         |        |        |
|----|----|---------|--------|--------|
| Ti | 20 | 0.7784  | 0.0252 | 0.2036 |
| Ti | 21 | 0.1504  | 0.5240 | 0.3062 |
| Ti | 22 | 0.0273  | 0.7706 | 0.1118 |
| Ti | 23 | 0.1533  | 0.7802 | 0.0210 |
| Ti | 24 | 0.1038  | 0.7756 | 0.3999 |
| Ti | 25 | 0.0295  | 0.5258 | 0.2069 |
| Ti | 26 | 0.4030  | 0.5278 | 0.3053 |
| Ti | 27 | 0.2771  | 0.7712 | 0.1144 |
| Ti | 28 | 0.4007  | 0.7802 | 0.0209 |
| Ti | 29 | 0.4409  | 0.7781 | 0.4007 |
| Ti | 30 | 0.2769  | 0.5265 | 0.2104 |
| Ti | 31 | 0.6530  | 0.5256 | 0.2971 |
| Ti | 32 | 0.5266  | 0.7711 | 0.1118 |
| Ti | 33 | 0.6507  | 0.7808 | 0.0193 |
| Ti | 34 | 0.6647  | 0.7763 | 0.3891 |
| Ti | 35 | 0.5251  | 0.5258 | 0.2065 |
| Ti | 36 | 0.9010  | 0.5247 | 0.2984 |
| Ti | 37 | 0.7768  | 0.7707 | 0.1094 |
| Ti | 38 | 0.9031  | 0.7805 | 0.0194 |
| Ti | 39 | 0.8833  | 0.7757 | 0.3902 |
| Ti | 40 | 0.7781  | 0.5251 | 0.2034 |
| As | 1  | -0.6492 | 0.5345 | 0.4969 |

H<sub>2</sub>AsO<sub>4</sub>-{101}

MM:

| Atom | Number | v      | w      | x      |
|------|--------|--------|--------|--------|
| H    | 1      | 0.3077 | 0.5724 | 0.4567 |
| H    | 2      | 0.4583 | 0.8958 | 0.5536 |
| O    | 1      | 0.0115 | 0.3353 | 0.0565 |
| O    | 2      | 0.0844 | 0.4076 | 0.2024 |
| O    | 3      | 0.1596 | 0.4818 | 0.3568 |
| O    | 4      | 0.1543 | 0.4777 | 0.1009 |
| O    | 5      | 0.2307 | 0.0533 | 0.2439 |
| O    | 6      | 0.0584 | 0.1308 | 0.3846 |
| O    | 7      | 0.0827 | 0.1566 | 0.0305 |
| O    | 8      | 0.1578 | 0.2314 | 0.1848 |
| O    | 9      | 0.2308 | 0.3024 | 0.3306 |
| O    | 10     | 0.1841 | 0.0079 | 0.0026 |
| O    | 11     | 0.0116 | 0.0849 | 0.1429 |
| O    | 12     | 0.0880 | 0.1610 | 0.2865 |
| O    | 13     | 0.2615 | 0.3357 | 0.0595 |
| O    | 14     | 0.3355 | 0.4098 | 0.2044 |
| O    | 15     | 0.4110 | 0.4821 | 0.3530 |

---

|   |    |        |        |         |
|---|----|--------|--------|---------|
| O | 16 | 0.4040 | 0.4796 | 0.0998  |
| O | 17 | 0.4821 | 0.0589 | 0.2412  |
| O | 18 | 0.3102 | 0.1337 | 0.3850  |
| O | 19 | 0.3315 | 0.1556 | 0.0303  |
| O | 20 | 0.4068 | 0.2307 | 0.1830  |
| O | 21 | 0.4824 | 0.3059 | 0.3273  |
| O | 22 | 0.4325 | 0.0068 | 0.0014  |
| O | 23 | 0.2615 | 0.0853 | 0.1446  |
| O | 24 | 0.3376 | 0.1616 | 0.2866  |
| O | 25 | 0.5111 | 0.3352 | 0.0561  |
| O | 26 | 0.5855 | 0.4094 | 0.2003  |
| O | 27 | 0.6607 | 0.4843 | 0.3542  |
| O | 28 | 0.6546 | 0.4785 | 0.0980  |
| O | 29 | 0.7314 | 0.0553 | 0.2412  |
| O | 30 | 0.5596 | 0.1319 | 0.3823  |
| O | 31 | 0.5816 | 0.1558 | 0.0288  |
| O | 32 | 0.6580 | 0.2319 | 0.1818  |
| O | 33 | 0.7317 | 0.3053 | 0.3273  |
| O | 34 | 0.6832 | 0.0072 | -0.0002 |
| O | 35 | 0.5113 | 0.0845 | 0.1419  |
| O | 36 | 0.5890 | 0.1624 | 0.2842  |
| O | 37 | 0.7613 | 0.3353 | 0.0552  |
| O | 38 | 0.8352 | 0.4088 | 0.2010  |
| O | 39 | 0.9104 | 0.4837 | 0.3554  |
| O | 40 | 0.9046 | 0.4787 | 0.0988  |
| O | 41 | 0.9810 | 0.0546 | 0.2423  |
| O | 42 | 0.8092 | 0.1327 | 0.3833  |
| O | 43 | 0.8323 | 0.1563 | 0.0291  |
| O | 44 | 0.9078 | 0.2315 | 0.1827  |
| O | 45 | 0.9811 | 0.3044 | 0.3283  |
| O | 46 | 0.9338 | 0.0079 | 0.0006  |
| O | 47 | 0.7617 | 0.0854 | 0.1418  |
| O | 48 | 0.8385 | 0.1619 | 0.2851  |
| O | 49 | 0.0115 | 0.8353 | 0.0563  |
| O | 50 | 0.0851 | 0.9083 | 0.2025  |
| O | 51 | 0.1602 | 0.9825 | 0.3567  |
| O | 52 | 0.1543 | 0.9780 | 0.1006  |
| O | 53 | 0.2301 | 0.5530 | 0.2454  |
| O | 54 | 0.0586 | 0.6319 | 0.3846  |
| O | 55 | 0.0827 | 0.6563 | 0.0305  |
| O | 56 | 0.1577 | 0.7306 | 0.1847  |
| O | 57 | 0.2313 | 0.8040 | 0.3312  |
| O | 58 | 0.1846 | 0.5091 | 0.0033  |
| O | 59 | 0.0116 | 0.5852 | 0.1429  |

---

---

|    |     |        |        |         |
|----|-----|--------|--------|---------|
| O  | 60  | 0.0882 | 0.6608 | 0.2865  |
| O  | 61  | 0.2616 | 0.8356 | 0.0596  |
| O  | 62  | 0.3356 | 0.9090 | 0.2045  |
| O  | 63  | 0.4107 | 0.9869 | 0.3525  |
| O  | 64  | 0.4039 | 0.9768 | 0.0998  |
| O  | 65  | 0.4819 | 0.5530 | 0.2414  |
| O  | 66  | 0.3063 | 0.6234 | 0.3887  |
| O  | 67  | 0.3315 | 0.6556 | 0.0306  |
| O  | 68  | 0.4077 | 0.7316 | 0.1854  |
| O  | 69  | 0.4812 | 0.8050 | 0.3252  |
| O  | 70  | 0.4326 | 0.5065 | 0.0014  |
| O  | 71  | 0.2616 | 0.5856 | 0.1465  |
| O  | 72  | 0.3369 | 0.6612 | 0.2910  |
| O  | 73  | 0.5112 | 0.8353 | 0.0559  |
| O  | 74  | 0.5854 | 0.9092 | 0.2004  |
| O  | 75  | 0.6609 | 0.9845 | 0.3542  |
| O  | 76  | 0.6545 | 0.9787 | 0.0981  |
| O  | 77  | 0.7314 | 0.5551 | 0.2412  |
| O  | 78  | 0.5595 | 0.6345 | 0.3824  |
| O  | 79  | 0.5817 | 0.6557 | 0.0289  |
| O  | 80  | 0.6580 | 0.7319 | 0.1819  |
| O  | 81  | 0.7317 | 0.8052 | 0.3273  |
| O  | 82  | 0.6831 | 0.5072 | -0.0002 |
| O  | 83  | 0.5112 | 0.5856 | 0.1421  |
| O  | 84  | 0.5891 | 0.6628 | 0.2843  |
| O  | 85  | 0.7613 | 0.8353 | 0.0552  |
| O  | 86  | 0.8352 | 0.9089 | 0.2010  |
| O  | 87  | 0.9103 | 0.9836 | 0.3554  |
| O  | 88  | 0.9046 | 0.9785 | 0.0988  |
| O  | 89  | 0.9811 | 0.5547 | 0.2423  |
| O  | 90  | 0.8091 | 0.6323 | 0.3834  |
| O  | 91  | 0.8323 | 0.6563 | 0.0290  |
| O  | 92  | 0.9078 | 0.7315 | 0.1827  |
| O  | 93  | 0.9810 | 0.8042 | 0.3281  |
| O  | 94  | 0.9338 | 0.5074 | 0.0006  |
| O  | 95  | 0.7617 | 0.5856 | 0.1418  |
| O  | 96  | 0.8385 | 0.6618 | 0.2852  |
| O  | 97  | 0.4457 | 0.5296 | 0.5135  |
| O  | 98  | 0.3224 | 0.5622 | 0.4953  |
| O  | 99  | 0.4140 | 0.8476 | 0.5407  |
| O  | 100 | 0.4263 | 0.7580 | 0.4318  |
| Ti | 1   | 0.1084 | 0.4320 | 0.0396  |
| Ti | 2   | 0.1774 | 0.0005 | 0.1825  |
| Ti | 3   | 0.2505 | 0.0723 | 0.3292  |

---

---

|    |    |         |        |        |
|----|----|---------|--------|--------|
| Ti | 4  | -0.0080 | 0.0662 | 0.0575 |
| Ti | 5  | 0.0650  | 0.1398 | 0.2048 |
| Ti | 6  | 0.1348  | 0.2080 | 0.3477 |
| Ti | 7  | 0.3569  | 0.4314 | 0.0391 |
| Ti | 8  | 0.4273  | 0.0007 | 0.1808 |
| Ti | 9  | 0.5013  | 0.0744 | 0.3255 |
| Ti | 10 | 0.2419  | 0.0662 | 0.0594 |
| Ti | 11 | 0.3146  | 0.1386 | 0.2059 |
| Ti | 12 | 0.3854  | 0.2099 | 0.3470 |
| Ti | 13 | 0.6075  | 0.4315 | 0.0373 |
| Ti | 14 | 0.6785  | 0.0024 | 0.1797 |
| Ti | 15 | 0.7512  | 0.0745 | 0.3266 |
| Ti | 16 | 0.4917  | 0.0659 | 0.0573 |
| Ti | 17 | 0.5655  | 0.1396 | 0.2027 |
| Ti | 18 | 0.6354  | 0.2090 | 0.3453 |
| Ti | 19 | 0.8579  | 0.4319 | 0.0378 |
| Ti | 20 | 0.9284  | 0.0021 | 0.1806 |
| Ti | 21 | 1.0008  | 0.0737 | 0.3278 |
| Ti | 22 | 0.7418  | 0.0659 | 0.0564 |
| Ti | 23 | 0.8153  | 0.1391 | 0.2034 |
| Ti | 24 | 0.8852  | 0.2086 | 0.3462 |
| Ti | 25 | 0.1079  | 0.9315 | 0.0395 |
| Ti | 26 | 0.1797  | 0.5029 | 0.1825 |
| Ti | 27 | 0.2519  | 0.5731 | 0.3296 |
| Ti | 28 | -0.0080 | 0.5657 | 0.0575 |
| Ti | 29 | 0.0651  | 0.6370 | 0.2048 |
| Ti | 30 | 0.1349  | 0.7065 | 0.3477 |
| Ti | 31 | 0.3569  | 0.9305 | 0.0391 |
| Ti | 32 | 0.4273  | 0.5013 | 0.1808 |
| Ti | 33 | 0.5011  | 0.5751 | 0.3257 |
| Ti | 34 | 0.2420  | 0.5662 | 0.0609 |
| Ti | 35 | 0.3159  | 0.6400 | 0.2115 |
| Ti | 36 | 0.3886  | 0.7130 | 0.3569 |
| Ti | 37 | 0.6075  | 0.9315 | 0.0373 |
| Ti | 38 | 0.6786  | 0.5025 | 0.1796 |
| Ti | 39 | 0.7511  | 0.5744 | 0.3266 |
| Ti | 40 | 0.4917  | 0.5660 | 0.0574 |
| Ti | 41 | 0.5655  | 0.6394 | 0.2029 |
| Ti | 42 | 0.6354  | 0.7092 | 0.3454 |
| Ti | 43 | 0.8580  | 0.9319 | 0.0378 |
| Ti | 44 | 0.9285  | 0.5022 | 0.1806 |
| Ti | 45 | 1.0009  | 0.5740 | 0.3278 |
| Ti | 46 | 0.7418  | 0.5659 | 0.0563 |
| Ti | 47 | 0.8153  | 0.6391 | 0.2035 |

---

|    |    |        |        |        |
|----|----|--------|--------|--------|
| Ti | 48 | 0.8852 | 0.7085 | 0.3462 |
| As | 1  | 0.4042 | 0.6628 | 0.4949 |

H<sub>2</sub>AsO<sub>4</sub>-{101}

BB:

| Atom | Number | v      | w      | x       |
|------|--------|--------|--------|---------|
| H    | 1      | 0.5360 | 0.6036 | 0.4550  |
| H    | 2      | 0.3561 | 0.5247 | 0.5250  |
| O    | 1      | 0.0115 | 0.3371 | 0.0557  |
| O    | 2      | 0.0833 | 0.4089 | 0.2010  |
| O    | 3      | 0.1559 | 0.4814 | 0.3557  |
| O    | 4      | 0.1539 | 0.4794 | 0.1003  |
| O    | 5      | 0.2280 | 0.0535 | 0.2451  |
| O    | 6      | 0.0554 | 0.1310 | 0.3832  |
| O    | 7      | 0.0828 | 0.1583 | 0.0297  |
| O    | 8      | 0.1568 | 0.2325 | 0.1841  |
| O    | 9      | 0.2281 | 0.3038 | 0.3307  |
| O    | 10     | 0.1852 | 0.0109 | 0.0030  |
| O    | 11     | 0.0104 | 0.0858 | 0.1419  |
| O    | 12     | 0.0857 | 0.1603 | 0.2851  |
| O    | 13     | 0.2616 | 0.3376 | 0.0603  |
| O    | 14     | 0.3347 | 0.4108 | 0.2068  |
| O    | 15     | 0.4055 | 0.4822 | 0.3422  |
| O    | 16     | 0.4025 | 0.4784 | 0.0994  |
| O    | 17     | 0.4797 | 0.0558 | 0.2409  |
| O    | 18     | 0.3027 | 0.1271 | 0.3880  |
| O    | 19     | 0.3309 | 0.1569 | 0.0297  |
| O    | 20     | 0.4055 | 0.2318 | 0.1839  |
| O    | 21     | 0.4793 | 0.3054 | 0.3250  |
| O    | 22     | 0.4324 | 0.0083 | 0.0011  |
| O    | 23     | 0.2609 | 0.0875 | 0.1466  |
| O    | 24     | 0.3346 | 0.1554 | 0.2910  |
| O    | 25     | 0.5108 | 0.3367 | 0.0555  |
| O    | 26     | 0.5838 | 0.4093 | 0.1995  |
| O    | 27     | 0.6575 | 0.4834 | 0.3538  |
| O    | 28     | 0.6536 | 0.4794 | 0.0976  |
| O    | 29     | 0.7294 | 0.0549 | 0.2409  |
| O    | 30     | 0.5564 | 0.1325 | 0.3822  |
| O    | 31     | 0.5813 | 0.1573 | 0.0284  |
| O    | 32     | 0.6565 | 0.2324 | 0.1817  |
| O    | 33     | 0.7286 | 0.3039 | 0.3271  |
| O    | 34     | 0.6831 | 0.0089 | -0.0005 |
| O    | 35     | 0.5097 | 0.0855 | 0.1418  |

---

|   |    |        |        |        |
|---|----|--------|--------|--------|
| O | 36 | 0.5867 | 0.1619 | 0.2837 |
| O | 37 | 0.7611 | 0.3366 | 0.0552 |
| O | 38 | 0.8338 | 0.4090 | 0.2008 |
| O | 39 | 0.9076 | 0.4826 | 0.3550 |
| O | 40 | 0.9037 | 0.4793 | 0.0980 |
| O | 41 | 0.9792 | 0.0548 | 0.2412 |
| O | 42 | 0.8060 | 0.1305 | 0.3830 |
| O | 43 | 0.8318 | 0.1573 | 0.0283 |
| O | 44 | 0.9061 | 0.2314 | 0.1819 |
| O | 45 | 0.9780 | 0.3030 | 0.3269 |
| O | 46 | 0.9337 | 0.0092 | 0.0000 |
| O | 47 | 0.7604 | 0.0860 | 0.1416 |
| O | 48 | 0.8360 | 0.1607 | 0.2848 |
| O | 49 | 0.0115 | 0.8371 | 0.0558 |
| O | 50 | 0.0832 | 0.9087 | 0.2009 |
| O | 51 | 0.1560 | 0.9819 | 0.3560 |
| O | 52 | 0.1538 | 0.9799 | 0.1004 |
| O | 53 | 0.2280 | 0.5541 | 0.2449 |
| O | 54 | 0.0551 | 0.6302 | 0.3834 |
| O | 55 | 0.0828 | 0.6584 | 0.0299 |
| O | 56 | 0.1568 | 0.7324 | 0.1840 |
| O | 57 | 0.2274 | 0.8031 | 0.3310 |
| O | 58 | 0.1852 | 0.5111 | 0.0029 |
| O | 59 | 0.0103 | 0.5855 | 0.1420 |
| O | 60 | 0.0857 | 0.6614 | 0.2852 |
| O | 61 | 0.2616 | 0.8376 | 0.0605 |
| O | 62 | 0.3343 | 0.9104 | 0.2056 |
| O | 63 | 0.4092 | 0.9863 | 0.3580 |
| O | 64 | 0.4029 | 0.9795 | 0.0994 |
| O | 65 | 0.4808 | 0.5576 | 0.2393 |
| O | 66 | 0.3028 | 0.6301 | 0.3878 |
| O | 67 | 0.3310 | 0.6568 | 0.0297 |
| O | 68 | 0.4053 | 0.7312 | 0.1836 |
| O | 69 | 0.4793 | 0.8066 | 0.3253 |
| O | 70 | 0.4323 | 0.5084 | 0.0009 |
| O | 71 | 0.2610 | 0.5865 | 0.1464 |
| O | 72 | 0.3345 | 0.6666 | 0.2908 |
| O | 73 | 0.5108 | 0.8371 | 0.0556 |
| O | 74 | 0.5838 | 0.9099 | 0.1993 |
| O | 75 | 0.6574 | 0.9825 | 0.3539 |
| O | 76 | 0.6537 | 0.9802 | 0.0976 |
| O | 77 | 0.7294 | 0.5554 | 0.2409 |
| O | 78 | 0.5549 | 0.6296 | 0.3812 |
| O | 79 | 0.5812 | 0.6573 | 0.0282 |

---



---

|    |     |         |        |         |
|----|-----|---------|--------|---------|
| O  | 80  | 0.6565  | 0.7324 | 0.1810  |
| O  | 81  | 0.7282  | 0.8036 | 0.3269  |
| O  | 82  | 0.6831  | 0.5088 | -0.0005 |
| O  | 83  | 0.5100  | 0.5856 | 0.1406  |
| O  | 84  | 0.5868  | 0.6626 | 0.2827  |
| O  | 85  | 0.7610  | 0.8366 | 0.0553  |
| O  | 86  | 0.8338  | 0.9090 | 0.2007  |
| O  | 87  | 0.9077  | 0.9828 | 0.3550  |
| O  | 88  | 0.9037  | 0.9793 | 0.0980  |
| O  | 89  | 0.9792  | 0.5546 | 0.2412  |
| O  | 90  | 0.8060  | 0.6317 | 0.3829  |
| O  | 91  | 0.8318  | 0.6573 | 0.0283  |
| O  | 92  | 0.9061  | 0.7314 | 0.1820  |
| O  | 93  | 0.9780  | 0.8031 | 0.3269  |
| O  | 94  | 0.9338  | 0.5093 | 0.0000  |
| O  | 95  | 0.7604  | 0.5854 | 0.1416  |
| O  | 96  | 0.8360  | 0.6610 | 0.2848  |
| O  | 97  | 0.4172  | 0.6849 | 0.4334  |
| O  | 98  | 0.5098  | 0.5832 | 0.4893  |
| O  | 99  | 0.3904  | 0.4717 | 0.5280  |
| O  | 100 | 0.4171  | 0.3063 | 0.4335  |
| Ti | 1   | 0.1085  | 0.4340 | 0.0387  |
| Ti | 2   | 0.1788  | 0.0043 | 0.1819  |
| Ti | 3   | 0.2488  | 0.0739 | 0.3296  |
| Ti | 4   | -0.0080 | 0.0677 | 0.0570  |
| Ti | 5   | 0.0646  | 0.1404 | 0.2038  |
| Ti | 6   | 0.1324  | 0.2079 | 0.3465  |
| Ti | 7   | 0.3563  | 0.4321 | 0.0382  |
| Ti | 8   | 0.4254  | 0.0010 | 0.1803  |
| Ti | 9   | 0.4971  | 0.0720 | 0.3260  |
| Ti | 10  | 0.2421  | 0.0682 | 0.0613  |
| Ti | 11  | 0.3147  | 0.1403 | 0.2130  |
| Ti | 12  | 0.3842  | 0.2124 | 0.3596  |
| Ti | 13  | 0.6072  | 0.4328 | 0.0366  |
| Ti | 14  | 0.6772  | 0.0034 | 0.1792  |
| Ti | 15  | 0.7479  | 0.0725 | 0.3263  |
| Ti | 16  | 0.4912  | 0.0676 | 0.0572  |
| Ti | 17  | 0.5638  | 0.1400 | 0.2029  |
| Ti | 18  | 0.6322  | 0.2077 | 0.3449  |
| Ti | 19  | 0.8577  | 0.4331 | 0.0369  |
| Ti | 20  | 0.9271  | 0.0022 | 0.1797  |
| Ti | 21  | 0.9982  | 0.0729 | 0.3264  |
| Ti | 22  | 0.7415  | 0.0674 | 0.0562  |
| Ti | 23  | 0.8140  | 0.1395 | 0.2033  |

---

|    |    |         |        |        |
|----|----|---------|--------|--------|
| Ti | 24 | 0.8823  | 0.2073 | 0.3460 |
| Ti | 25 | 0.1085  | 0.9341 | 0.0388 |
| Ti | 26 | 0.1786  | 0.5040 | 0.1819 |
| Ti | 27 | 0.2488  | 0.5750 | 0.3295 |
| Ti | 28 | -0.0080 | 0.5678 | 0.0570 |
| Ti | 29 | 0.0645  | 0.6407 | 0.2038 |
| Ti | 30 | 0.1321  | 0.7079 | 0.3466 |
| Ti | 31 | 0.3564  | 0.9324 | 0.0385 |
| Ti | 32 | 0.4244  | 0.4998 | 0.1792 |
| Ti | 33 | 0.4954  | 0.5698 | 0.3206 |
| Ti | 34 | 0.2421  | 0.5682 | 0.0610 |
| Ti | 35 | 0.3145  | 0.6413 | 0.2124 |
| Ti | 36 | 0.3842  | 0.7099 | 0.3587 |
| Ti | 37 | 0.6072  | 0.9336 | 0.0366 |
| Ti | 38 | 0.6772  | 0.5022 | 0.1792 |
| Ti | 39 | 0.7479  | 0.5731 | 0.3262 |
| Ti | 40 | 0.4917  | 0.5680 | 0.0568 |
| Ti | 41 | 0.5645  | 0.6408 | 0.2011 |
| Ti | 42 | 0.6313  | 0.7069 | 0.3443 |
| Ti | 43 | 0.8576  | 0.9331 | 0.0369 |
| Ti | 44 | 0.9271  | 0.5021 | 0.1797 |
| Ti | 45 | 0.9980  | 0.5728 | 0.3265 |
| Ti | 46 | 0.7415  | 0.5673 | 0.0562 |
| Ti | 47 | 0.8140  | 0.6396 | 0.2033 |
| Ti | 48 | 0.8823  | 0.7075 | 0.3460 |
| As | 1  | 0.4323  | 0.5109 | 0.4668 |

O<sub>2</sub>-{001}:

| Atom | Number | v       | w       | x       |
|------|--------|---------|---------|---------|
| O    | 1      | 0.1499  | -0.0039 | -0.0021 |
| O    | 2      | 0.1284  | 0.0103  | 0.3823  |
| O    | 3      | 0.0271  | 0.2777  | 0.1912  |
| O    | 4      | 0.1499  | 0.2918  | 0.0967  |
| O    | 5      | 0.0250  | 0.0231  | 0.2871  |
| O    | 6      | 0.0249  | 0.0288  | 0.1301  |
| O    | 7      | 0.1480  | 0.2785  | 0.3241  |
| O    | 8      | 0.0254  | 0.2480  | 0.0358  |
| O    | 9      | -0.0151 | 0.2785  | 0.4233  |
| O    | 10     | 0.1501  | 0.0294  | 0.2270  |
| O    | 11     | 0.3980  | -0.0035 | -0.0029 |
| O    | 12     | 0.4030  | 0.0308  | 0.3788  |
| O    | 13     | 0.2734  | 0.2780  | 0.1907  |

---

|   |    |         |         |         |
|---|----|---------|---------|---------|
| O | 14 | 0.3993  | 0.2918  | 0.0956  |
| O | 15 | 0.2766  | 0.0464  | 0.2874  |
| O | 16 | 0.2746  | 0.0288  | 0.1303  |
| O | 17 | 0.4127  | 0.2784  | 0.3204  |
| O | 18 | 0.2742  | 0.2476  | 0.0356  |
| O | 19 | 0.1722  | 0.2791  | 0.4548  |
| O | 20 | 0.3987  | 0.0276  | 0.2232  |
| O | 21 | 0.6496  | -0.0024 | -0.0036 |
| O | 22 | 0.6396  | 0.0297  | 0.3742  |
| O | 23 | 0.5227  | 0.2776  | 0.1887  |
| O | 24 | 0.6496  | 0.2911  | 0.0946  |
| O | 25 | 0.5256  | 0.0301  | 0.2825  |
| O | 26 | 0.5249  | 0.0287  | 0.1272  |
| O | 27 | 0.6588  | 0.2783  | 0.3141  |
| O | 28 | 0.5241  | 0.2501  | 0.0337  |
| O | 29 | 0.5376  | 0.2795  | 0.4197  |
| O | 30 | 0.6496  | 0.0278  | 0.2199  |
| O | 31 | 0.9015  | -0.0025 | -0.0027 |
| O | 32 | 0.8686  | 0.0296  | 0.3763  |
| O | 33 | 0.7765  | 0.2775  | 0.1887  |
| O | 34 | 0.9002  | 0.2912  | 0.0958  |
| O | 35 | 0.7743  | 0.0226  | 0.2818  |
| O | 36 | 0.7747  | 0.0287  | 0.1270  |
| O | 37 | 0.9025  | 0.2783  | 0.3180  |
| O | 38 | 0.7753  | 0.2507  | 0.0337  |
| O | 39 | 0.7592  | 0.2786  | 0.4203  |
| O | 40 | 0.9012  | 0.0283  | 0.2228  |
| O | 41 | 0.1498  | 0.4965  | -0.0021 |
| O | 42 | 0.1282  | 0.5468  | 0.3822  |
| O | 43 | 0.0274  | 0.7777  | 0.1910  |
| O | 44 | 0.1498  | 0.7920  | 0.0968  |
| O | 45 | 0.0250  | 0.5333  | 0.2870  |
| O | 46 | 0.0248  | 0.5288  | 0.1301  |
| O | 47 | 0.1735  | 0.7785  | 0.3173  |
| O | 48 | 0.0254  | 0.7480  | 0.0358  |
| O | 49 | -0.0671 | 0.7787  | 0.4473  |
| O | 50 | 0.1500  | 0.5270  | 0.2270  |
| O | 51 | 0.3980  | 0.4970  | -0.0029 |
| O | 52 | 0.4031  | 0.5262  | 0.3789  |
| O | 53 | 0.2729  | 0.7780  | 0.1919  |
| O | 54 | 0.3993  | 0.7918  | 0.0959  |
| O | 55 | 0.2766  | 0.5102  | 0.2874  |
| O | 56 | 0.2746  | 0.5292  | 0.1304  |
| O | 57 | 0.4041  | 0.7785  | 0.3176  |

---

---

|    |    |         |        |         |
|----|----|---------|--------|---------|
| O  | 58 | 0.2742  | 0.7477 | 0.0360  |
| O  | 59 | 0.2833  | 0.7786 | 0.4133  |
| O  | 60 | 0.3987  | 0.5286 | 0.2232  |
| O  | 61 | 0.6496  | 0.4977 | -0.0036 |
| O  | 62 | 0.6399  | 0.5273 | 0.3742  |
| O  | 63 | 0.5230  | 0.7776 | 0.1887  |
| O  | 64 | 0.6497  | 0.7911 | 0.0946  |
| O  | 65 | 0.5257  | 0.5265 | 0.2825  |
| O  | 66 | 0.5249  | 0.5287 | 0.1272  |
| O  | 67 | 0.6501  | 0.7784 | 0.3149  |
| O  | 68 | 0.5240  | 0.7502 | 0.0338  |
| O  | 69 | 0.5188  | 0.7786 | 0.4186  |
| O  | 70 | 0.6497  | 0.5278 | 0.2198  |
| O  | 71 | 0.9015  | 0.4972 | -0.0027 |
| O  | 72 | 0.8686  | 0.5271 | 0.3763  |
| O  | 73 | 0.7767  | 0.7775 | 0.1883  |
| O  | 74 | 0.9002  | 0.7916 | 0.0957  |
| O  | 75 | 0.7743  | 0.5338 | 0.2818  |
| O  | 76 | 0.7748  | 0.5285 | 0.1269  |
| O  | 77 | 0.9018  | 0.7784 | 0.3182  |
| O  | 78 | 0.7753  | 0.7507 | 0.0336  |
| O  | 79 | 0.7377  | 0.7787 | 0.4256  |
| O  | 80 | 0.9012  | 0.5277 | 0.2228  |
| O  | 81 | -0.6265 | 0.1891 | -0.5312 |
| O  | 82 | -0.6291 | 0.3651 | -0.5317 |
| Ti | 1  | 0.1474  | 0.0372 | 0.3048  |
| Ti | 2  | 0.0250  | 0.2725 | 0.1133  |
| Ti | 3  | 0.1498  | 0.2803 | 0.0213  |
| Ti | 4  | 0.1069  | 0.2787 | 0.4041  |
| Ti | 5  | 0.0247  | 0.0272 | 0.2087  |
| Ti | 6  | 0.3997  | 0.0370 | 0.3027  |
| Ti | 7  | 0.2746  | 0.2725 | 0.1132  |
| Ti | 8  | 0.3986  | 0.2808 | 0.0205  |
| Ti | 9  | 0.4265  | 0.2783 | 0.4019  |
| Ti | 10 | 0.2746  | 0.0285 | 0.2090  |
| Ti | 11 | 0.6492  | 0.0268 | 0.2986  |
| Ti | 12 | 0.5246  | 0.2722 | 0.1111  |
| Ti | 13 | 0.6496  | 0.2811 | 0.0196  |
| Ti | 14 | 0.6540  | 0.2784 | 0.3896  |
| Ti | 15 | 0.5241  | 0.0274 | 0.2059  |
| Ti | 16 | 0.8969  | 0.0218 | 0.3037  |
| Ti | 17 | 0.7747  | 0.2722 | 0.1109  |
| Ti | 18 | 0.9009  | 0.2809 | 0.0207  |
| Ti | 19 | 0.8793  | 0.2784 | 0.3926  |

---

|    |    |        |        |        |
|----|----|--------|--------|--------|
| Ti | 20 | 0.7765 | 0.0273 | 0.2057 |
| Ti | 21 | 0.1474 | 0.5198 | 0.3048 |
| Ti | 22 | 0.0250 | 0.7725 | 0.1131 |
| Ti | 23 | 0.1499 | 0.7802 | 0.0214 |
| Ti | 24 | 0.1737 | 0.7786 | 0.3892 |
| Ti | 25 | 0.0246 | 0.5279 | 0.2087 |
| Ti | 26 | 0.3997 | 0.5198 | 0.3028 |
| Ti | 27 | 0.2746 | 0.7725 | 0.1136 |
| Ti | 28 | 0.3986 | 0.7805 | 0.0206 |
| Ti | 29 | 0.4070 | 0.7784 | 0.3914 |
| Ti | 30 | 0.2746 | 0.5271 | 0.2091 |
| Ti | 31 | 0.6493 | 0.5300 | 0.2986 |
| Ti | 32 | 0.5246 | 0.7722 | 0.1111 |
| Ti | 33 | 0.6496 | 0.7811 | 0.0197 |
| Ti | 34 | 0.6359 | 0.7785 | 0.3919 |
| Ti | 35 | 0.5241 | 0.5277 | 0.2059 |
| Ti | 36 | 0.8970 | 0.5351 | 0.3037 |
| Ti | 37 | 0.7748 | 0.7722 | 0.1109 |
| Ti | 38 | 0.9008 | 0.7811 | 0.0206 |
| Ti | 39 | 0.8594 | 0.7784 | 0.4005 |
| Ti | 40 | 0.7765 | 0.5274 | 0.2056 |

O<sub>2</sub>-{101}:

| Atom | Number | v      | w      | x      |
|------|--------|--------|--------|--------|
| O    | 1      | 0.0103 | 0.3353 | 0.0559 |
| O    | 2      | 0.0828 | 0.4078 | 0.2013 |
| O    | 3      | 0.1580 | 0.4828 | 0.3563 |
| O    | 4      | 0.1524 | 0.4775 | 0.0994 |
| O    | 5      | 0.2287 | 0.0534 | 0.2424 |
| O    | 6      | 0.0576 | 0.1319 | 0.3839 |
| O    | 7      | 0.0812 | 0.1560 | 0.0291 |
| O    | 8      | 0.1566 | 0.2324 | 0.1829 |
| O    | 9      | 0.2294 | 0.3040 | 0.3296 |
| O    | 10     | 0.1828 | 0.0080 | 0.0008 |
| O    | 11     | 0.0102 | 0.0847 | 0.1425 |
| O    | 12     | 0.0869 | 0.1626 | 0.2856 |
| O    | 13     | 0.2606 | 0.3357 | 0.0571 |
| O    | 14     | 0.3344 | 0.4107 | 0.2039 |
| O    | 15     | 0.4090 | 0.4785 | 0.3508 |
| O    | 16     | 0.4032 | 0.4796 | 0.1000 |
| O    | 17     | 0.4809 | 0.0556 | 0.2417 |
| O    | 18     | 0.3087 | 0.1340 | 0.3840 |
| O    | 19     | 0.3311 | 0.1565 | 0.0299 |

---

|   |    |        |        |        |
|---|----|--------|--------|--------|
| O | 20 | 0.4059 | 0.2315 | 0.1834 |
| O | 21 | 0.4817 | 0.3076 | 0.3265 |
| O | 22 | 0.4322 | 0.0074 | 0.0016 |
| O | 23 | 0.2605 | 0.0861 | 0.1431 |
| O | 24 | 0.3343 | 0.1603 | 0.2853 |
| O | 25 | 0.5106 | 0.3360 | 0.0563 |
| O | 26 | 0.5844 | 0.4099 | 0.2012 |
| O | 27 | 0.6594 | 0.4849 | 0.3552 |
| O | 28 | 0.6536 | 0.4790 | 0.0990 |
| O | 29 | 0.7302 | 0.0557 | 0.2423 |
| O | 30 | 0.5578 | 0.1351 | 0.3832 |
| O | 31 | 0.5811 | 0.1564 | 0.0294 |
| O | 32 | 0.6570 | 0.2325 | 0.1826 |
| O | 33 | 0.7303 | 0.3057 | 0.3283 |
| O | 34 | 0.6825 | 0.0077 | 0.0007 |
| O | 35 | 0.5102 | 0.0861 | 0.1424 |
| O | 36 | 0.5878 | 0.1606 | 0.2847 |
| O | 37 | 0.7604 | 0.3355 | 0.0562 |
| O | 38 | 0.8342 | 0.4093 | 0.2018 |
| O | 39 | 0.9095 | 0.4846 | 0.3564 |
| O | 40 | 0.9033 | 0.4782 | 0.0989 |
| O | 41 | 0.9800 | 0.0548 | 0.2422 |
| O | 42 | 0.8081 | 0.1334 | 0.3844 |
| O | 43 | 0.8311 | 0.1562 | 0.0292 |
| O | 44 | 0.9065 | 0.2316 | 0.1829 |
| O | 45 | 0.9797 | 0.3047 | 0.3281 |
| O | 46 | 0.9326 | 0.0072 | 0.0006 |
| O | 47 | 0.7606 | 0.0858 | 0.1427 |
| O | 48 | 0.8373 | 0.1624 | 0.2859 |
| O | 49 | 0.0106 | 0.8356 | 0.0561 |
| O | 50 | 0.0845 | 0.9094 | 0.2015 |
| O | 51 | 0.1588 | 0.9837 | 0.3561 |
| O | 52 | 0.1534 | 0.9784 | 0.0989 |
| O | 53 | 0.2290 | 0.5540 | 0.2443 |
| O | 54 | 0.0576 | 0.6332 | 0.3839 |
| O | 55 | 0.0812 | 0.6563 | 0.0291 |
| O | 56 | 0.1566 | 0.7307 | 0.1829 |
| O | 57 | 0.2296 | 0.8046 | 0.3299 |
| O | 58 | 0.1835 | 0.5087 | 0.0019 |
| O | 59 | 0.0102 | 0.5855 | 0.1426 |
| O | 60 | 0.0870 | 0.6610 | 0.2856 |
| O | 61 | 0.2606 | 0.8362 | 0.0571 |
| O | 62 | 0.3344 | 0.9092 | 0.2038 |
| O | 63 | 0.4091 | 0.9919 | 0.3507 |

---

---

|    |    |         |        |        |
|----|----|---------|--------|--------|
| O  | 64 | 0.4032  | 0.9778 | 0.0999 |
| O  | 65 | 0.4808  | 0.5577 | 0.2418 |
| O  | 66 | 0.3036  | 0.6268 | 0.3890 |
| O  | 67 | 0.3312  | 0.6565 | 0.0305 |
| O  | 68 | 0.4069  | 0.7325 | 0.1853 |
| O  | 69 | 0.4794  | 0.8056 | 0.3310 |
| O  | 70 | 0.4322  | 0.5077 | 0.0016 |
| O  | 71 | 0.2597  | 0.5850 | 0.1442 |
| O  | 72 | 0.3356  | 0.6620 | 0.2912 |
| O  | 73 | 0.5107  | 0.8360 | 0.0564 |
| O  | 74 | 0.5843  | 0.9098 | 0.2004 |
| O  | 75 | 0.6596  | 0.9852 | 0.3562 |
| O  | 76 | 0.6537  | 0.9792 | 0.0989 |
| O  | 77 | 0.7303  | 0.5558 | 0.2423 |
| O  | 78 | 0.5578  | 0.6322 | 0.3832 |
| O  | 79 | 0.5811  | 0.6564 | 0.0294 |
| O  | 80 | 0.6570  | 0.7324 | 0.1827 |
| O  | 81 | 0.7303  | 0.8059 | 0.3283 |
| O  | 82 | 0.6825  | 0.5076 | 0.0007 |
| O  | 83 | 0.5102  | 0.5852 | 0.1425 |
| O  | 84 | 0.5877  | 0.6661 | 0.2847 |
| O  | 85 | 0.7604  | 0.8356 | 0.0562 |
| O  | 86 | 0.8342  | 0.9094 | 0.2018 |
| O  | 87 | 0.9095  | 0.9845 | 0.3564 |
| O  | 88 | 0.9033  | 0.9786 | 0.0989 |
| O  | 89 | 0.9800  | 0.5553 | 0.2422 |
| O  | 90 | 0.8079  | 0.6334 | 0.3842 |
| O  | 91 | 0.8310  | 0.6561 | 0.0292 |
| O  | 92 | 0.9064  | 0.7315 | 0.1827 |
| O  | 93 | 0.9796  | 0.8046 | 0.3280 |
| O  | 94 | 0.9326  | 0.5078 | 0.0006 |
| O  | 95 | 0.7606  | 0.5857 | 0.1427 |
| O  | 96 | 0.8373  | 0.6624 | 0.2858 |
| O  | 97 | 0.4130  | 0.8300 | 0.4420 |
| O  | 98 | 0.4177  | 0.6600 | 0.4409 |
| Ti | 1  | 0.1076  | 0.4325 | 0.0379 |
| Ti | 2  | 0.1766  | 0.0016 | 0.1812 |
| Ti | 3  | 0.2496  | 0.0743 | 0.3283 |
| Ti | 4  | -0.0089 | 0.0665 | 0.0577 |
| Ti | 5  | 0.0651  | 0.1425 | 0.2041 |
| Ti | 6  | 0.1342  | 0.2104 | 0.3465 |
| Ti | 7  | 0.3564  | 0.4322 | 0.0392 |
| Ti | 8  | 0.4260  | 0.0009 | 0.1812 |
| Ti | 9  | 0.4984  | 0.0735 | 0.3258 |

---

---

|    |    |         |        |        |
|----|----|---------|--------|--------|
| Ti | 10 | 0.2408  | 0.0662 | 0.0581 |
| Ti | 11 | 0.3136  | 0.1392 | 0.2051 |
| Ti | 12 | 0.3841  | 0.2108 | 0.3451 |
| Ti | 13 | 0.6068  | 0.4321 | 0.0384 |
| Ti | 14 | 0.6774  | 0.0030 | 0.1809 |
| Ti | 15 | 0.7493  | 0.0746 | 0.3279 |
| Ti | 16 | 0.4910  | 0.0664 | 0.0582 |
| Ti | 17 | 0.5642  | 0.1394 | 0.2037 |
| Ti | 18 | 0.6330  | 0.2083 | 0.3463 |
| Ti | 19 | 0.8569  | 0.4319 | 0.0382 |
| Ti | 20 | 0.9277  | 0.0028 | 0.1810 |
| Ti | 21 | 0.9997  | 0.0744 | 0.3274 |
| Ti | 22 | 0.7410  | 0.0662 | 0.0576 |
| Ti | 23 | 0.8145  | 0.1395 | 0.2044 |
| Ti | 24 | 0.8839  | 0.2090 | 0.3468 |
| Ti | 25 | 0.1068  | 0.9317 | 0.0382 |
| Ti | 26 | 0.1808  | 0.5058 | 0.1804 |
| Ti | 27 | 0.2518  | 0.5763 | 0.3290 |
| Ti | 28 | -0.0089 | 0.5658 | 0.0577 |
| Ti | 29 | 0.0651  | 0.6372 | 0.2041 |
| Ti | 30 | 0.1342  | 0.7076 | 0.3465 |
| Ti | 31 | 0.3564  | 0.9314 | 0.0392 |
| Ti | 32 | 0.4260  | 0.5029 | 0.1812 |
| Ti | 33 | 0.4981  | 0.5746 | 0.3260 |
| Ti | 34 | 0.2412  | 0.5666 | 0.0607 |
| Ti | 35 | 0.3166  | 0.6422 | 0.2156 |
| Ti | 36 | 0.3875  | 0.7150 | 0.3665 |
| Ti | 37 | 0.6068  | 0.9321 | 0.0383 |
| Ti | 38 | 0.6773  | 0.5030 | 0.1810 |
| Ti | 39 | 0.7491  | 0.5746 | 0.3276 |
| Ti | 40 | 0.4910  | 0.5664 | 0.0582 |
| Ti | 41 | 0.5642  | 0.6397 | 0.2038 |
| Ti | 42 | 0.6329  | 0.7088 | 0.3463 |
| Ti | 43 | 0.8569  | 0.9319 | 0.0382 |
| Ti | 44 | 0.9277  | 0.5030 | 0.1810 |
| Ti | 45 | 0.9997  | 0.5748 | 0.3274 |
| Ti | 46 | 0.7410  | 0.5662 | 0.0577 |
| Ti | 47 | 0.8145  | 0.6395 | 0.2043 |
| Ti | 48 | 0.8838  | 0.7088 | 0.3468 |

---
